# Supplementary material for: Structure–activity relationships in hydroxy-2,3-diarylxanthone antioxidants. Fast kinetics spectroscopy as a tool to evaluate the potential for antioxidant activity in biological systems
Source: Royal Society of Chemistry journal article supplement (doi:10.1039/c0ob00841a), 2011-01-01

## Supplementary Information

### Structure-activity relationships in hydroxy-2,3-diarylxanthone antioxidants. Fast kinetics spectroscopy as a tool to evaluate the potential for antioxidant activity in biological systems

Clementina M. M. Santos,<sup>a,b</sup> Artur M. S. Silva,<sup>a</sup> Paulo Filipe,<sup>c</sup> René Santos,<sup>d</sup>

L. K. Patterson,<sup>e,f</sup> Jean-Claude Mazière,<sup>f,g,h</sup> José A. S. Cavaleiro,<sup>a</sup> Patrice Morlière,<sup>f,g,h,\*</sup>

<sup>a</sup> Department of Chemistry & QOPNA, University of Aveiro, 3810-193 Aveiro, Portugal

<sup>b</sup> Department of Vegetal Production and Technology, School of Agriculture, Polytechnic Institute of Bragança, 5301-855 Bragança, Portugal

<sup>c</sup> Universidade de Lisboa, Hospital de Santa Maria, Clinica Universitária de Dermatologia, 1600 Lisbon, Portugal

<sup>d</sup> Muséum National d'Histoire Naturelle, Département RDDM, F-75231 Paris, France

<sup>e</sup> University of Notre Dame, Radiation Laboratory, Notre Dame, Indiana 46556, USA

<sup>f</sup> CHU Amiens, Laboratoire de Biochimie, F-80054 Amiens, France

<sup>g</sup> INSERM, ERI12, F-80054 Amiens, France

<sup>h</sup> Université de Picardie Jules Verne, Faculté de Médecine et de Pharmacie, EA 4292, F-80036 Amiens, France

\* Corresponding author: INSERM ERI12, Laboratoire de Biochimie, CHU Amiens - Hôpital Nord, place Victor Pauchet, 80054 Amiens Cedex 1, FRANCE. Phone: +33 3 22 66 86 69; Fax: +33 3 22 66 85 93; E-mail: [morliere.patrice@chu-amiens.fr](mailto:morliere.patrice@chu-amiens.fr)

## Supplementary Information

### Table of Contents:

|                                                                                |     |
|--------------------------------------------------------------------------------|-----|
| <sup>1</sup> H NMR spectrum of compound <b>XH1</b> (300 MHz) .....             | S4  |
| <sup>1</sup> H NMR spectrum (expansion) of compound <b>XH1</b> (300 MHz) ..... | S5  |
| <sup>13</sup> C NMR spectrum of compound <b>XH1</b> (75 MHz) .....             | S6  |
| <sup>13</sup> C NMR spectrum (expansion) of compound <b>XH1</b> (75 MHz) ..... | S7  |
| <sup>1</sup> H NMR spectrum of compound <b>XH2</b> (300 MHz) .....             | S8  |
| <sup>1</sup> H NMR spectrum (expansion) of compound <b>XH2</b> (300 MHz) ..... | S9  |
| <sup>13</sup> C NMR spectrum of compound <b>XH3</b> (75 MHz) .....             | S10 |
| <sup>13</sup> C NMR spectrum (expansion) of compound <b>XH2</b> (75 MHz) ..... | S11 |
| <sup>1</sup> H NMR spectrum of compound <b>XH3</b> (300 MHz) .....             | S12 |
| <sup>1</sup> H NMR spectrum (expansion) of compound <b>XH3</b> (300 MHz) ..... | S13 |
| <sup>13</sup> C NMR spectrum of compound <b>XH3</b> (75 MHz) .....             | S14 |
| <sup>13</sup> C NMR spectrum (expansion) of compound <b>XH3</b> (75 MHz) ..... | S15 |
| <sup>1</sup> H NMR spectrum of compound <b>XH4</b> (300 MHz) .....             | S16 |
| <sup>1</sup> H NMR spectrum (expansion) of compound <b>XH4</b> (300 MHz) ..... | S17 |
| <sup>13</sup> C NMR spectrum of compound <b>XH4</b> (75 MHz) .....             | S18 |
| <sup>13</sup> C NMR spectrum (expansion) of compound <b>XH4</b> (75 MHz) ..... | S19 |
| <sup>1</sup> H NMR spectrum of compound <b>XH5</b> (300 MHz) .....             | S20 |
| <sup>1</sup> H NMR spectrum (expansion) of compound <b>XH5</b> (300 MHz) ..... | S21 |
| <sup>13</sup> C NMR spectrum of compound <b>XH5</b> (75 MHz) .....             | S22 |
| <sup>13</sup> C NMR spectrum (expansion) of compound <b>XH5</b> (75 MHz) ..... | S23 |
| <sup>1</sup> H NMR spectrum of compound <b>XH6</b> (300 MHz) .....             | S24 |
| <sup>1</sup> H NMR spectrum (expansion) of compound <b>XH6</b> (300 MHz) ..... | S25 |
| <sup>13</sup> C NMR spectrum of compound <b>XH6</b> (75 MHz) .....             | S26 |
| <sup>13</sup> C NMR spectrum (expansion) of compound <b>XH6</b> (75 MHz) ..... | S27 |
| <sup>1</sup> H NMR spectrum of compound <b>XH7</b> (300 MHz) .....             | S28 |
| <sup>1</sup> H NMR spectrum (expansion) of compound <b>XH7</b> (300 MHz) ..... | S29 |
| <sup>13</sup> C NMR spectrum of compound <b>XH7</b> (75 MHz) .....             | S30 |
| <sup>13</sup> C NMR spectrum (expansion) of compound <b>XH7</b> (75 MHz) ..... | S31 |
| <sup>1</sup> H NMR spectrum of compound <b>XH8</b> (300 MHz) .....             | S32 |
| <sup>1</sup> H NMR spectrum (expansion) of compound <b>XH8</b> (300 MHz) ..... | S33 |
| <sup>13</sup> C NMR spectrum of compound <b>XH8</b> (75 MHz) .....             | S34 |

|                                                                                |     |
|--------------------------------------------------------------------------------|-----|
| <sup>13</sup> C NMR spectrum (expansion) of compound <b>XH8</b> (75 MHz) ..... | S35 |
| <sup>1</sup> H NMR spectrum of compound <b>XH9</b> (300 MHz) .....             | S36 |
| <sup>1</sup> H NMR spectrum (expansion) of compound <b>XH9</b> (300 MHz) ..... | S37 |
| <sup>1</sup> H NMR spectrum (expansion) of compound <b>XH9</b> (300 MHz) ..... | S38 |
| <sup>13</sup> C NMR spectrum of compound <b>XH9</b> (75 MHz) .....             | S39 |
| <sup>13</sup> C NMR spectrum (expansion) of compound <b>XH9</b> (75 MHz) ..... | S40 |

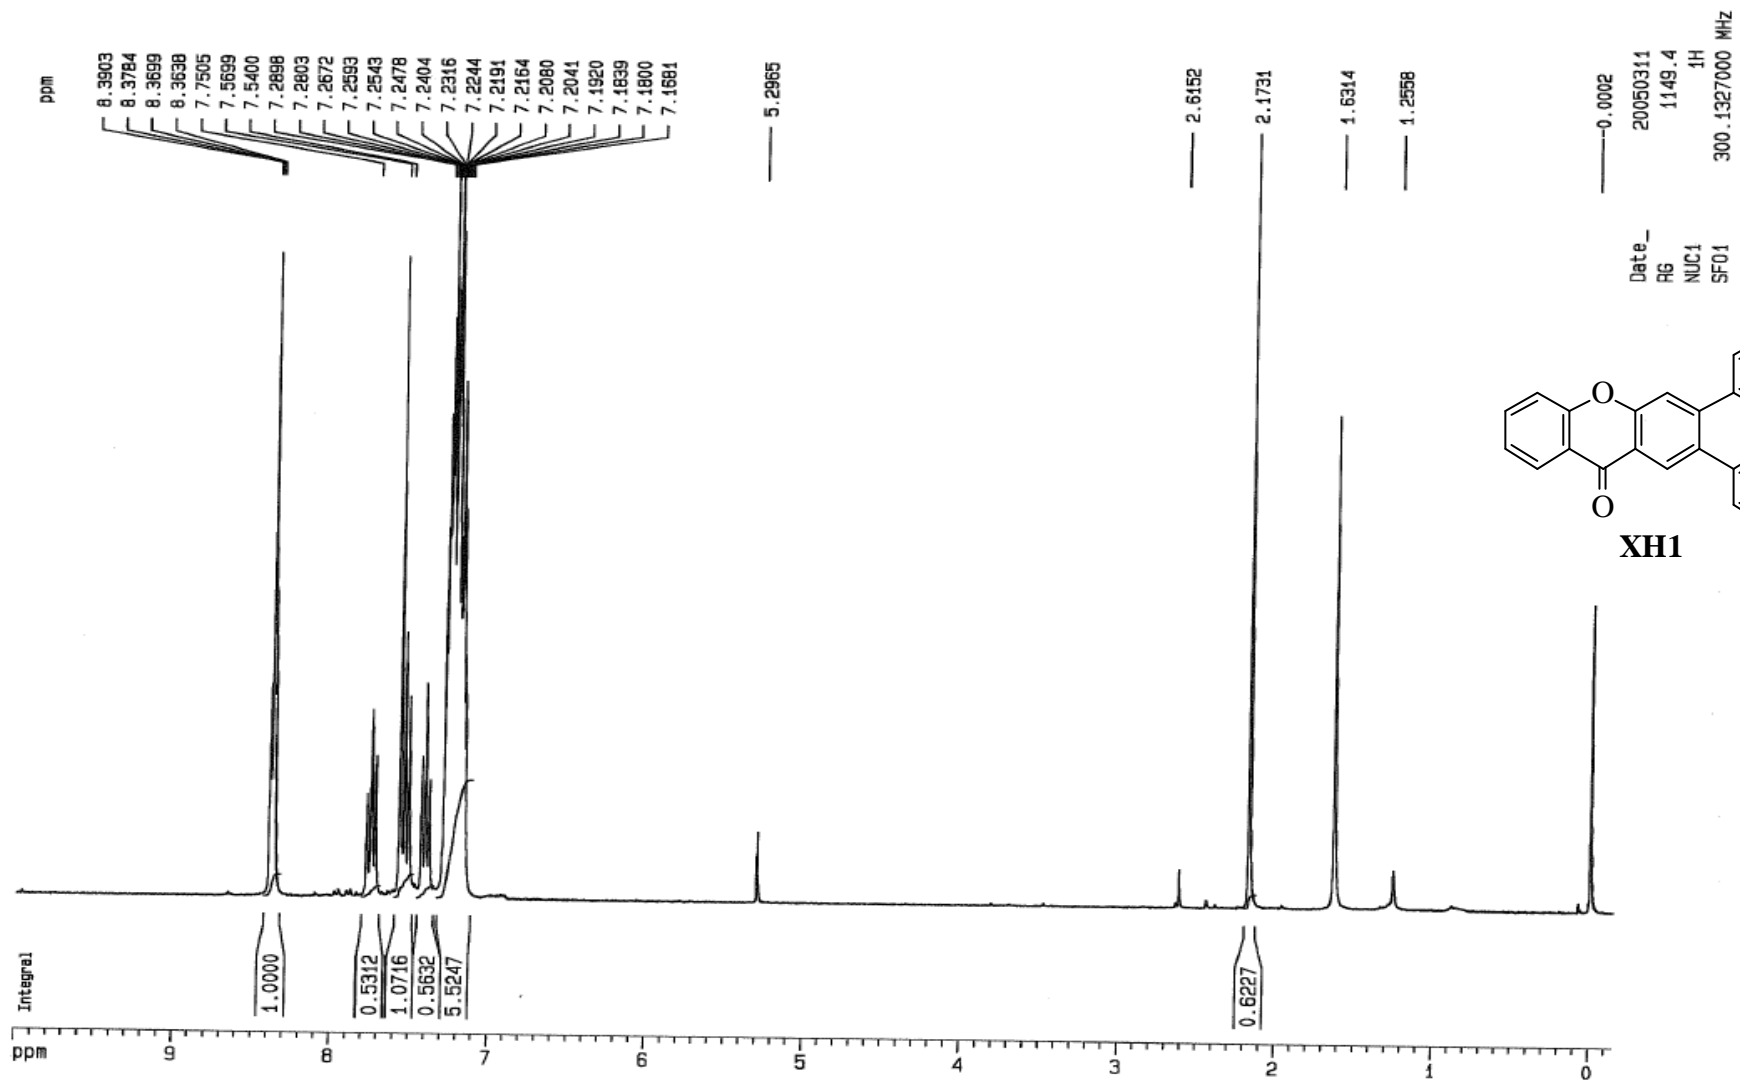

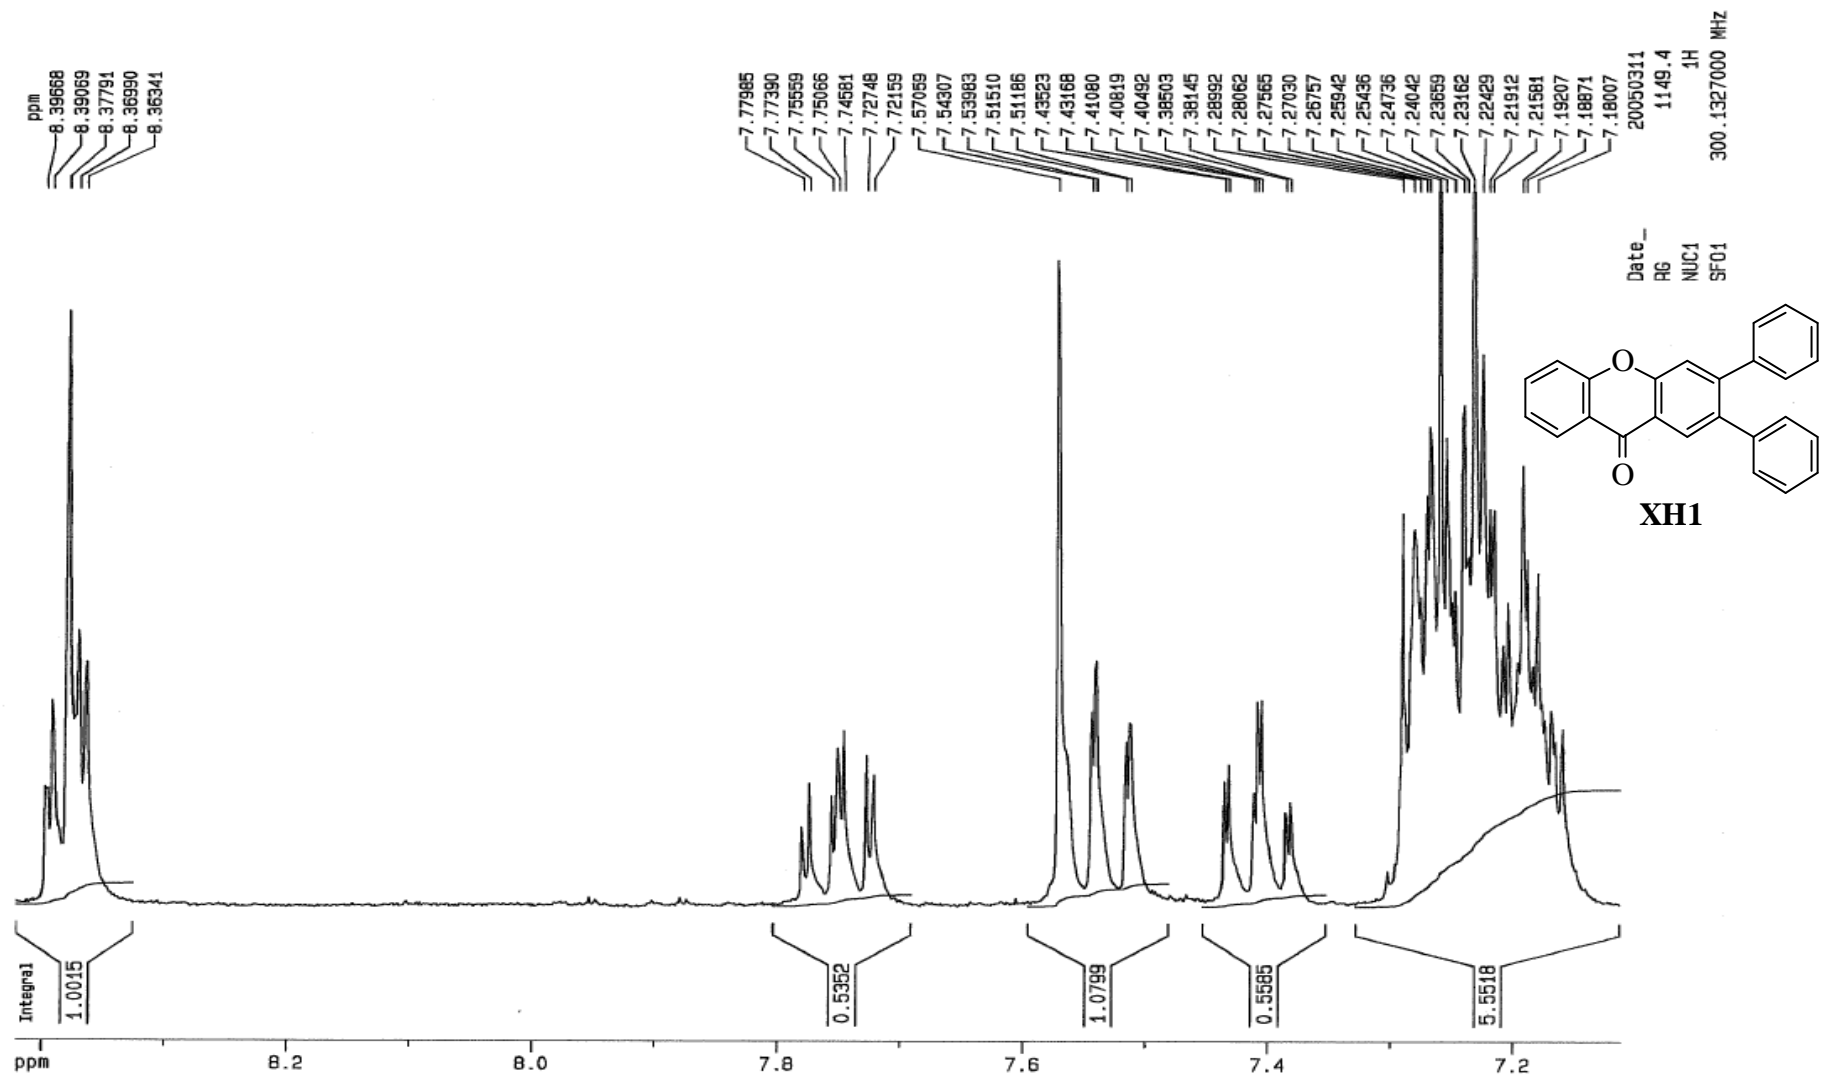

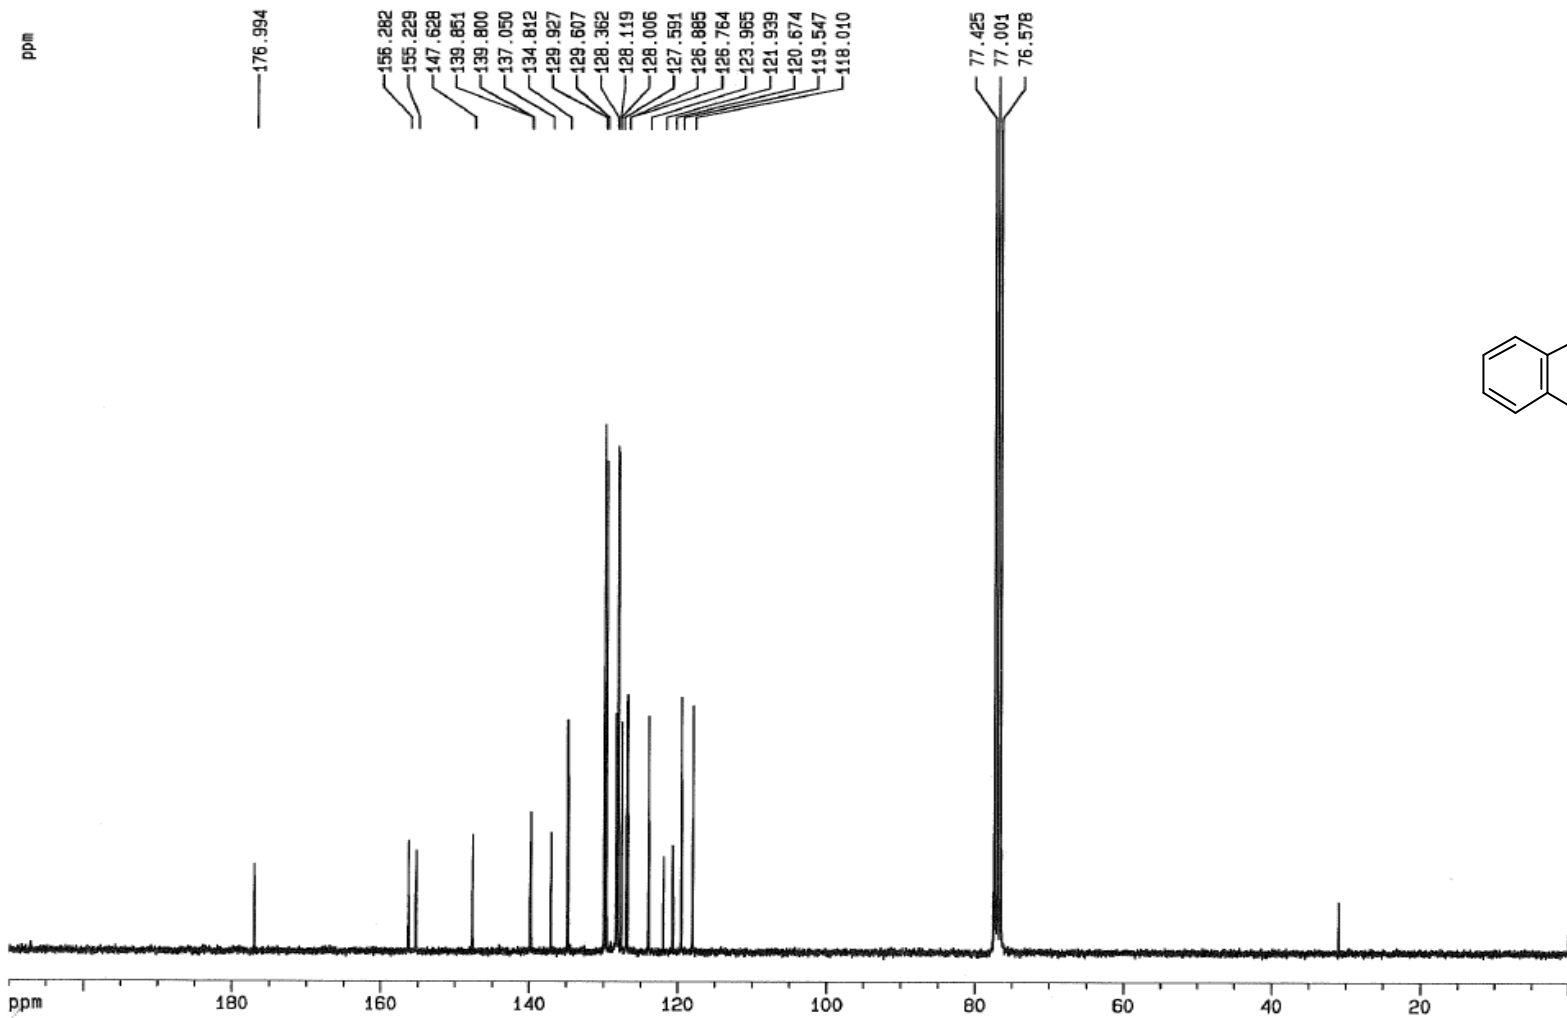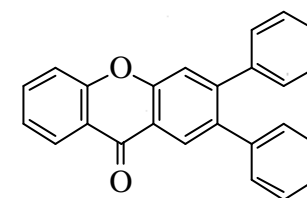

**XH1**

Date\_ 20050315  
RG 16364  
NUC1 13C  
SF01 75.4747190 MHz  
d11 0.03000000 sec.

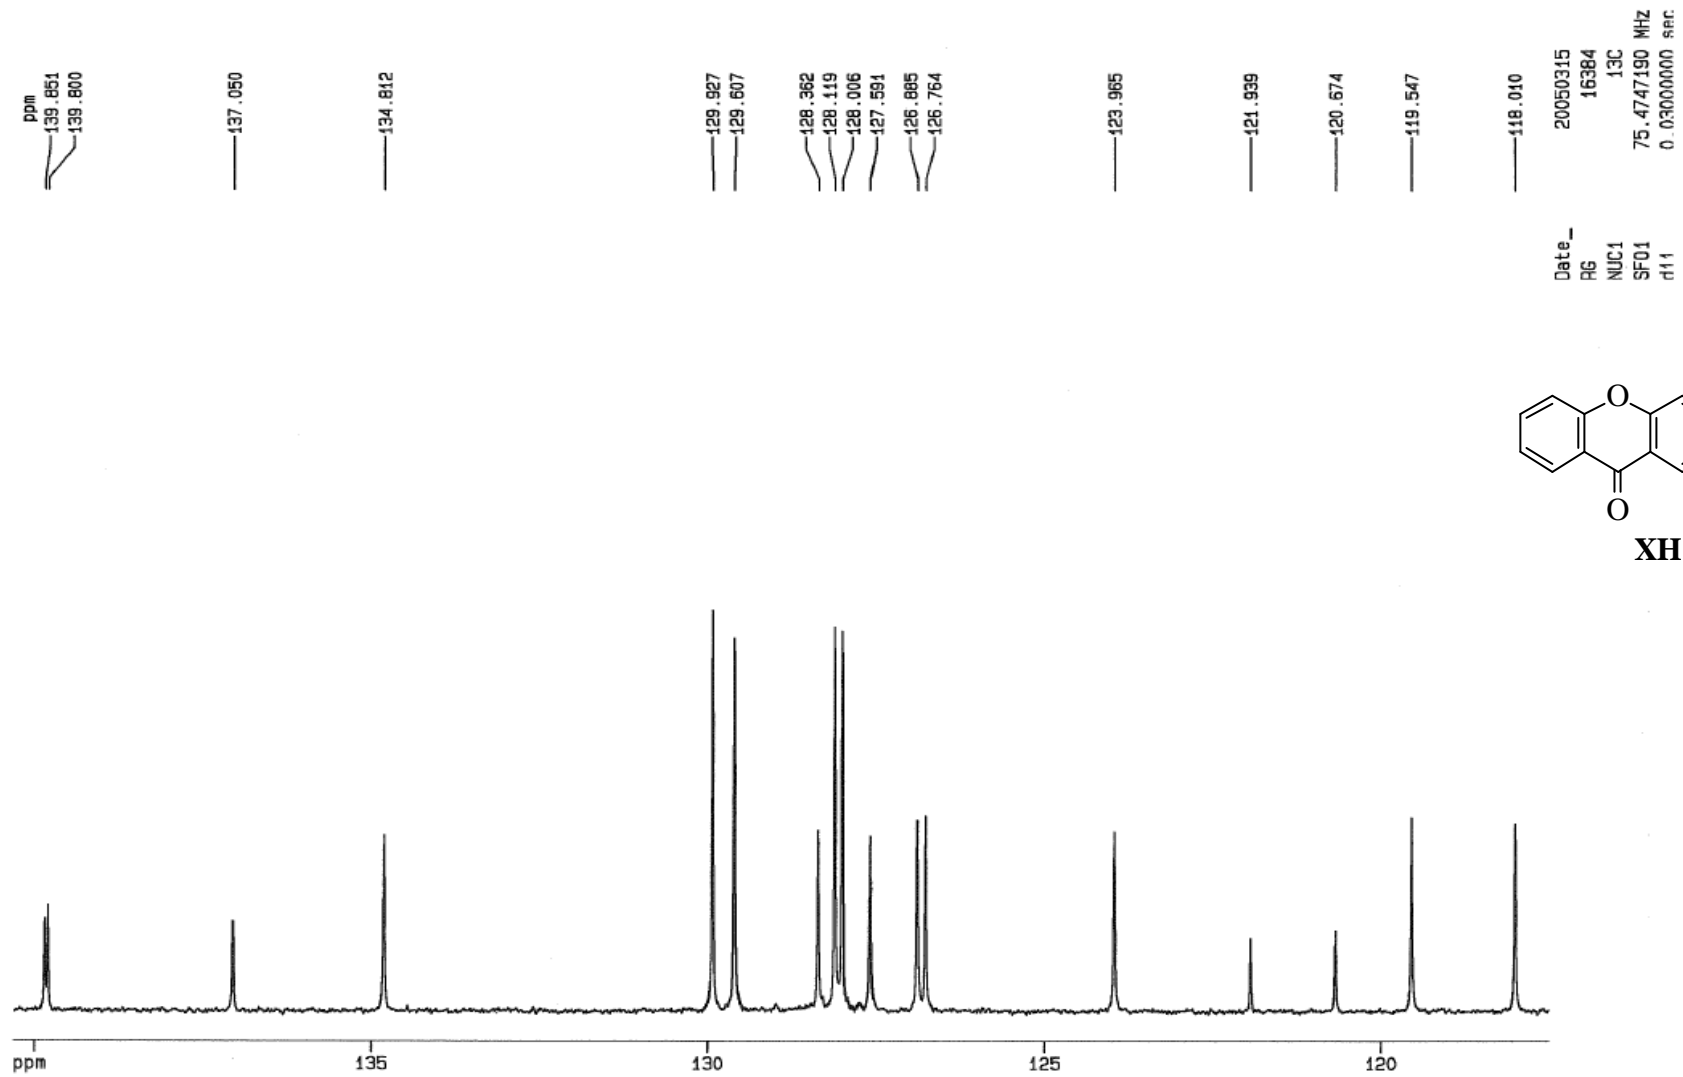

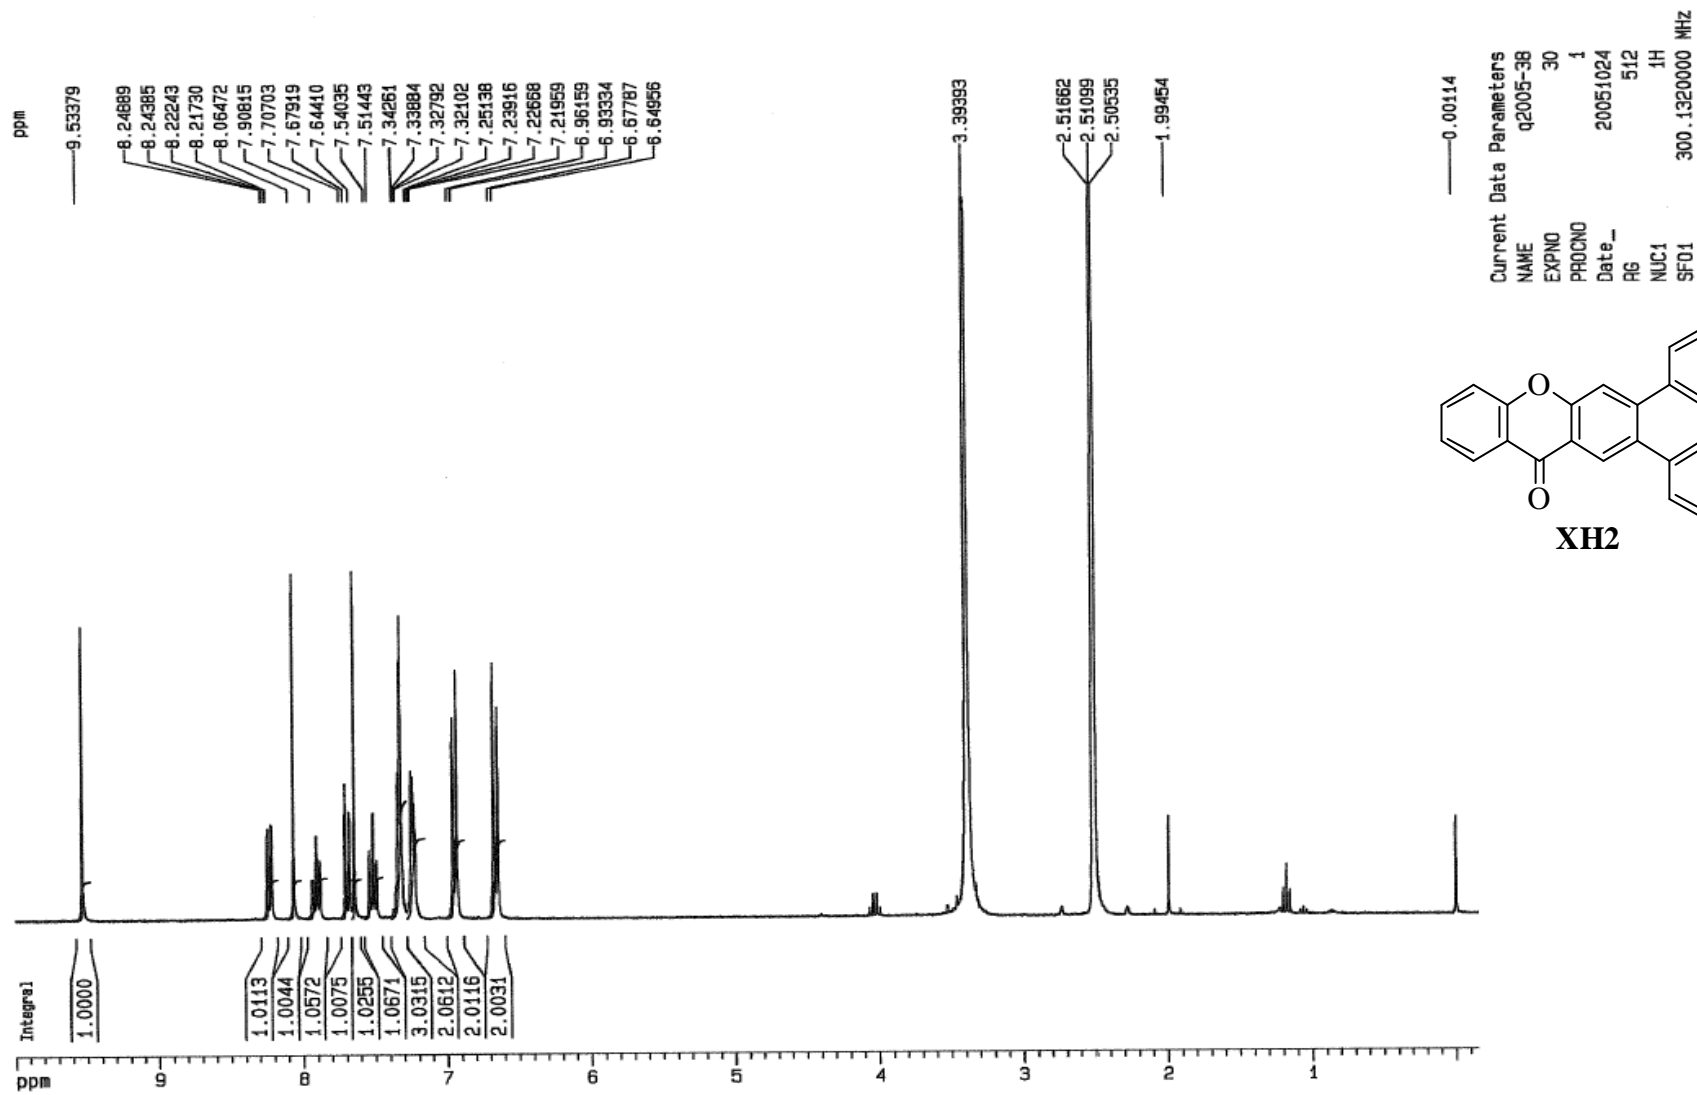



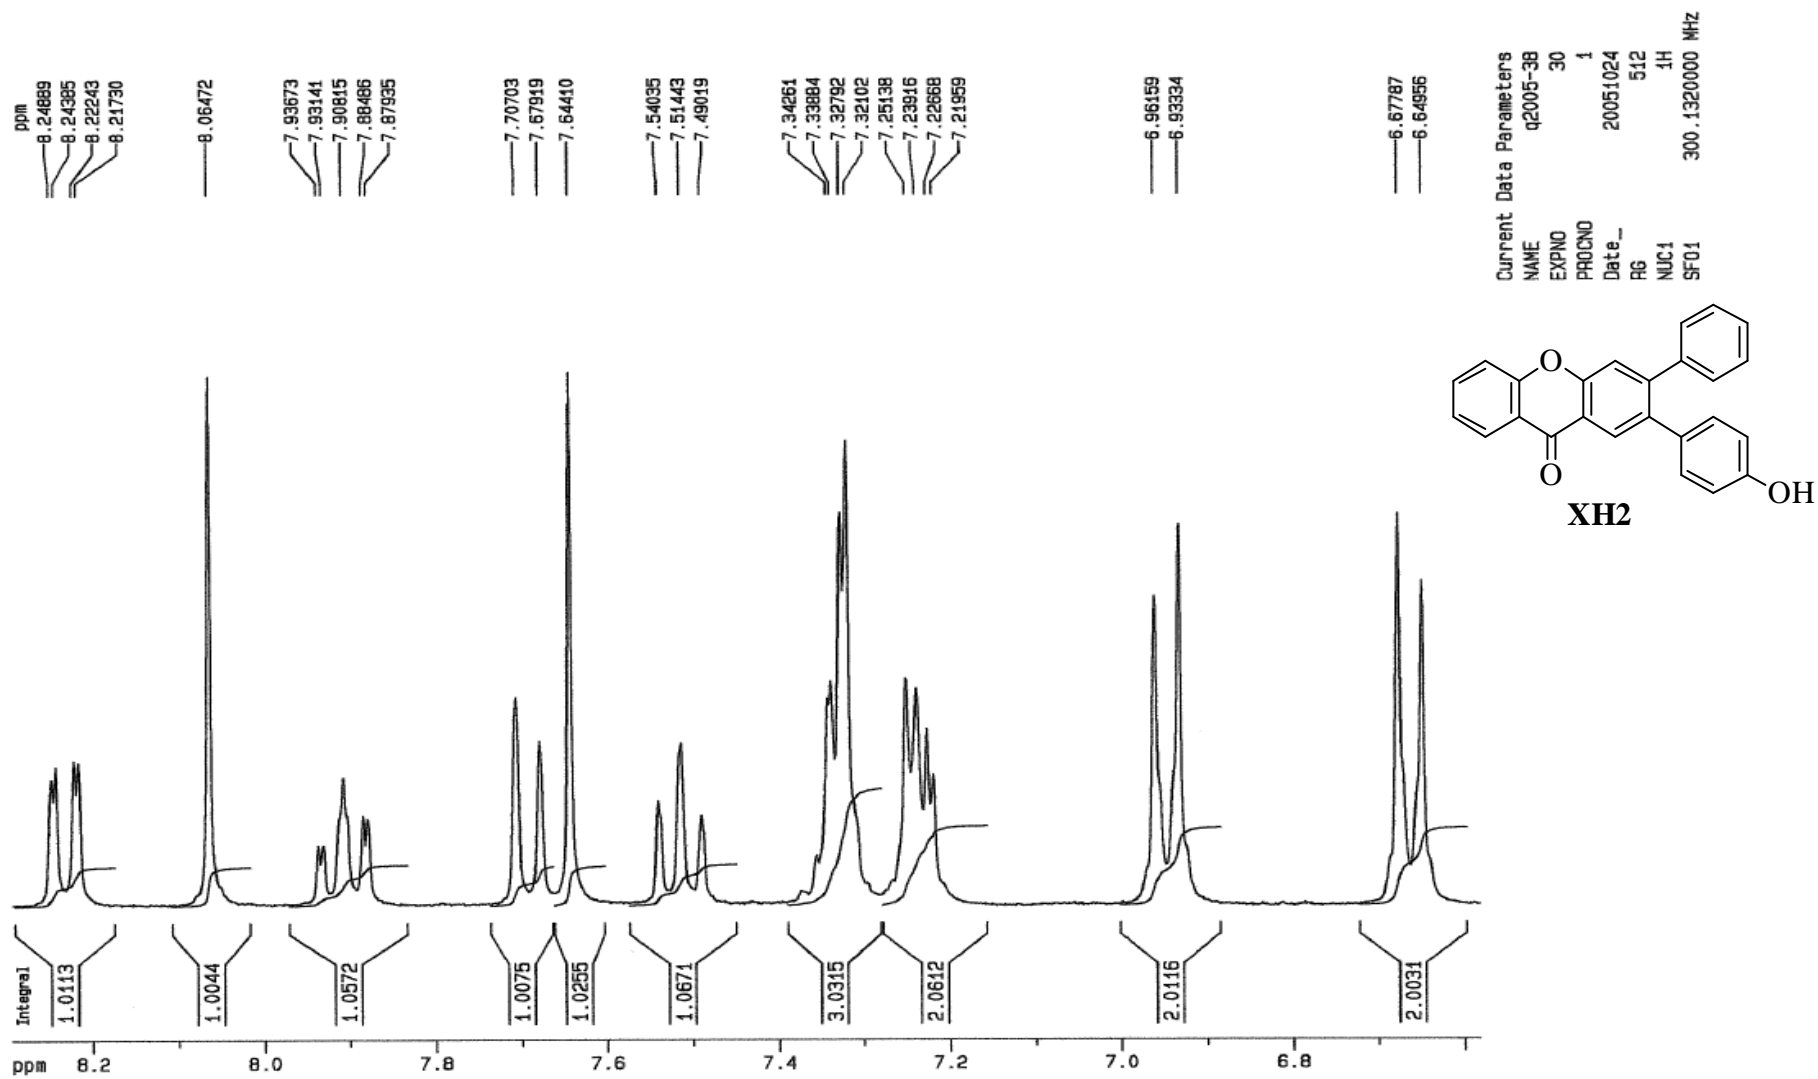

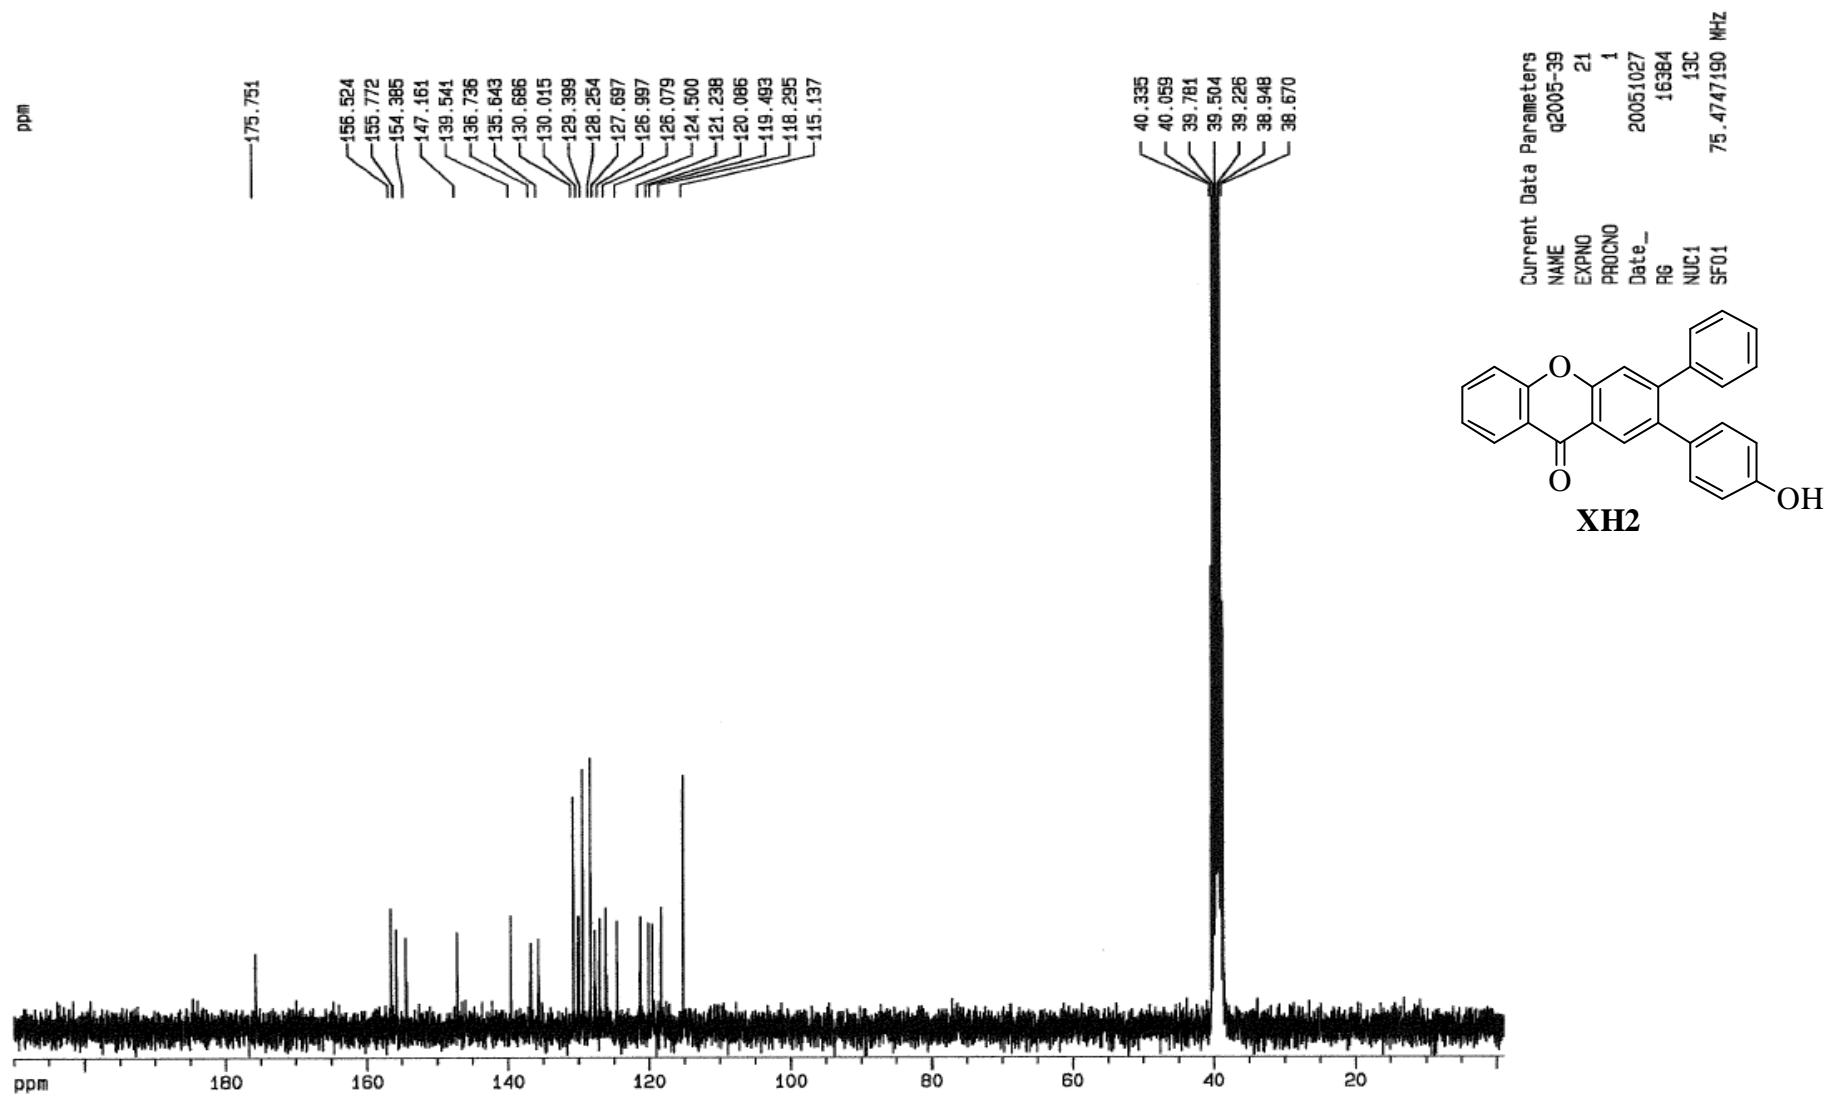

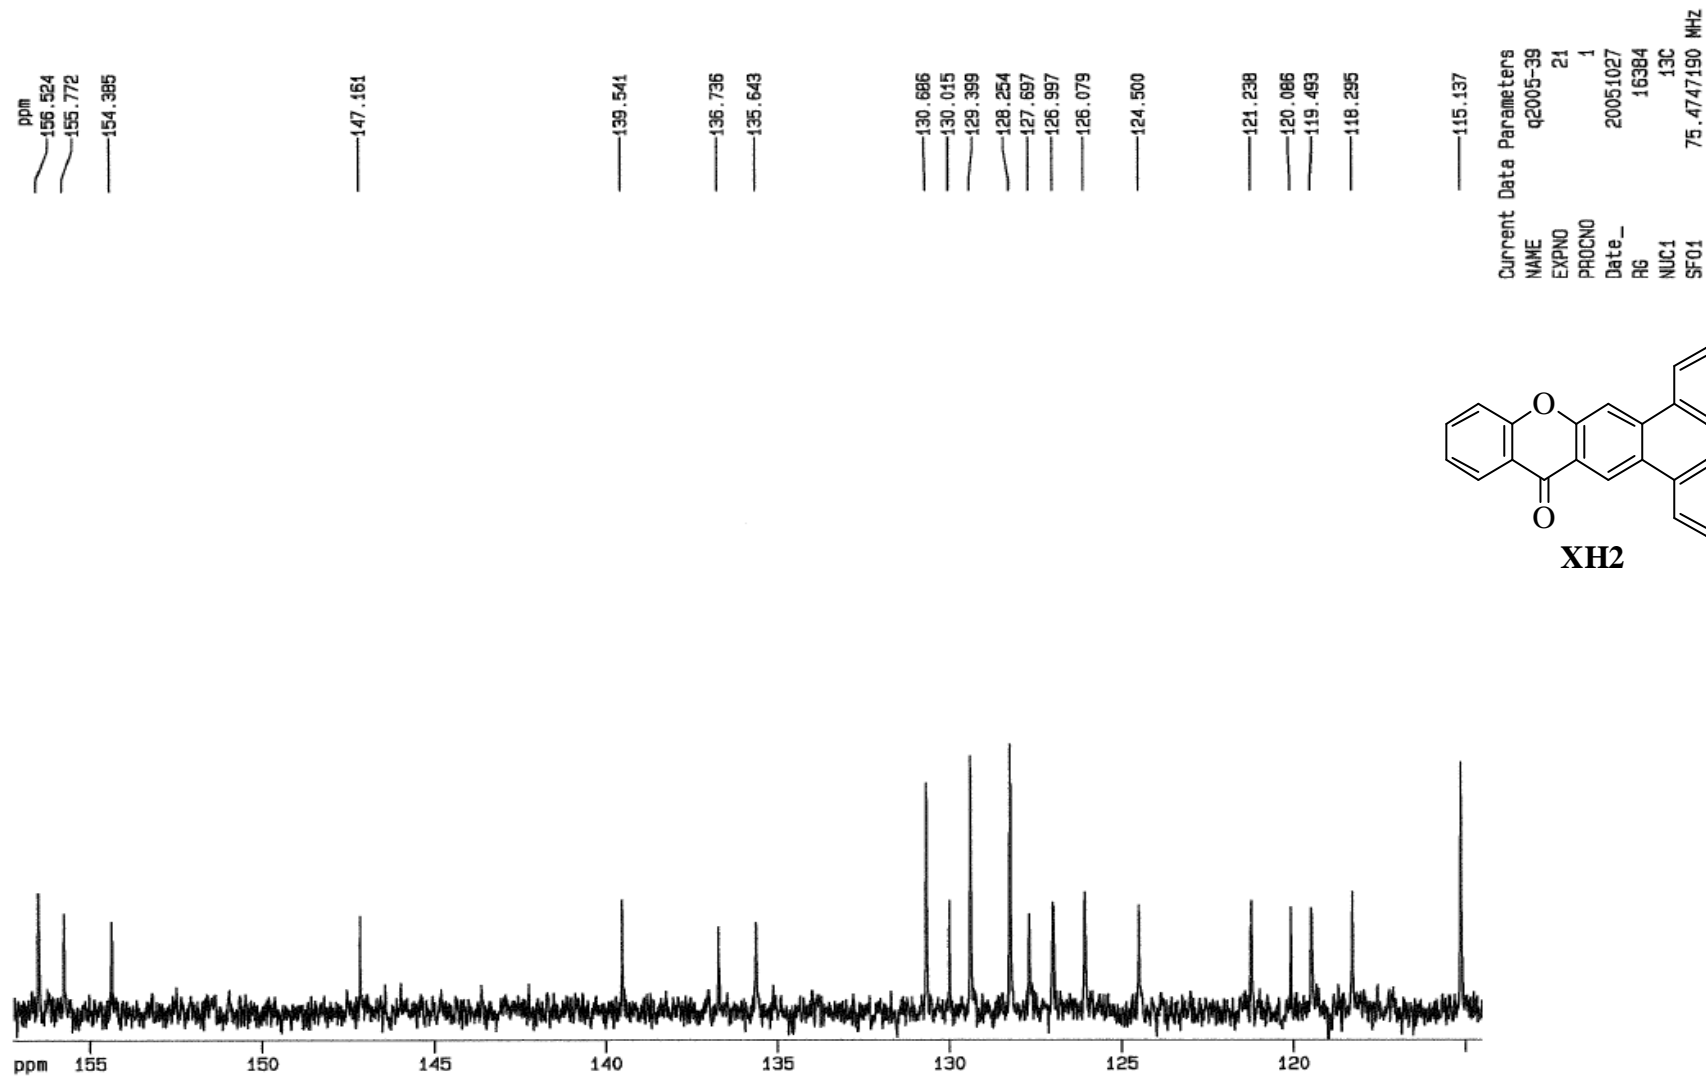

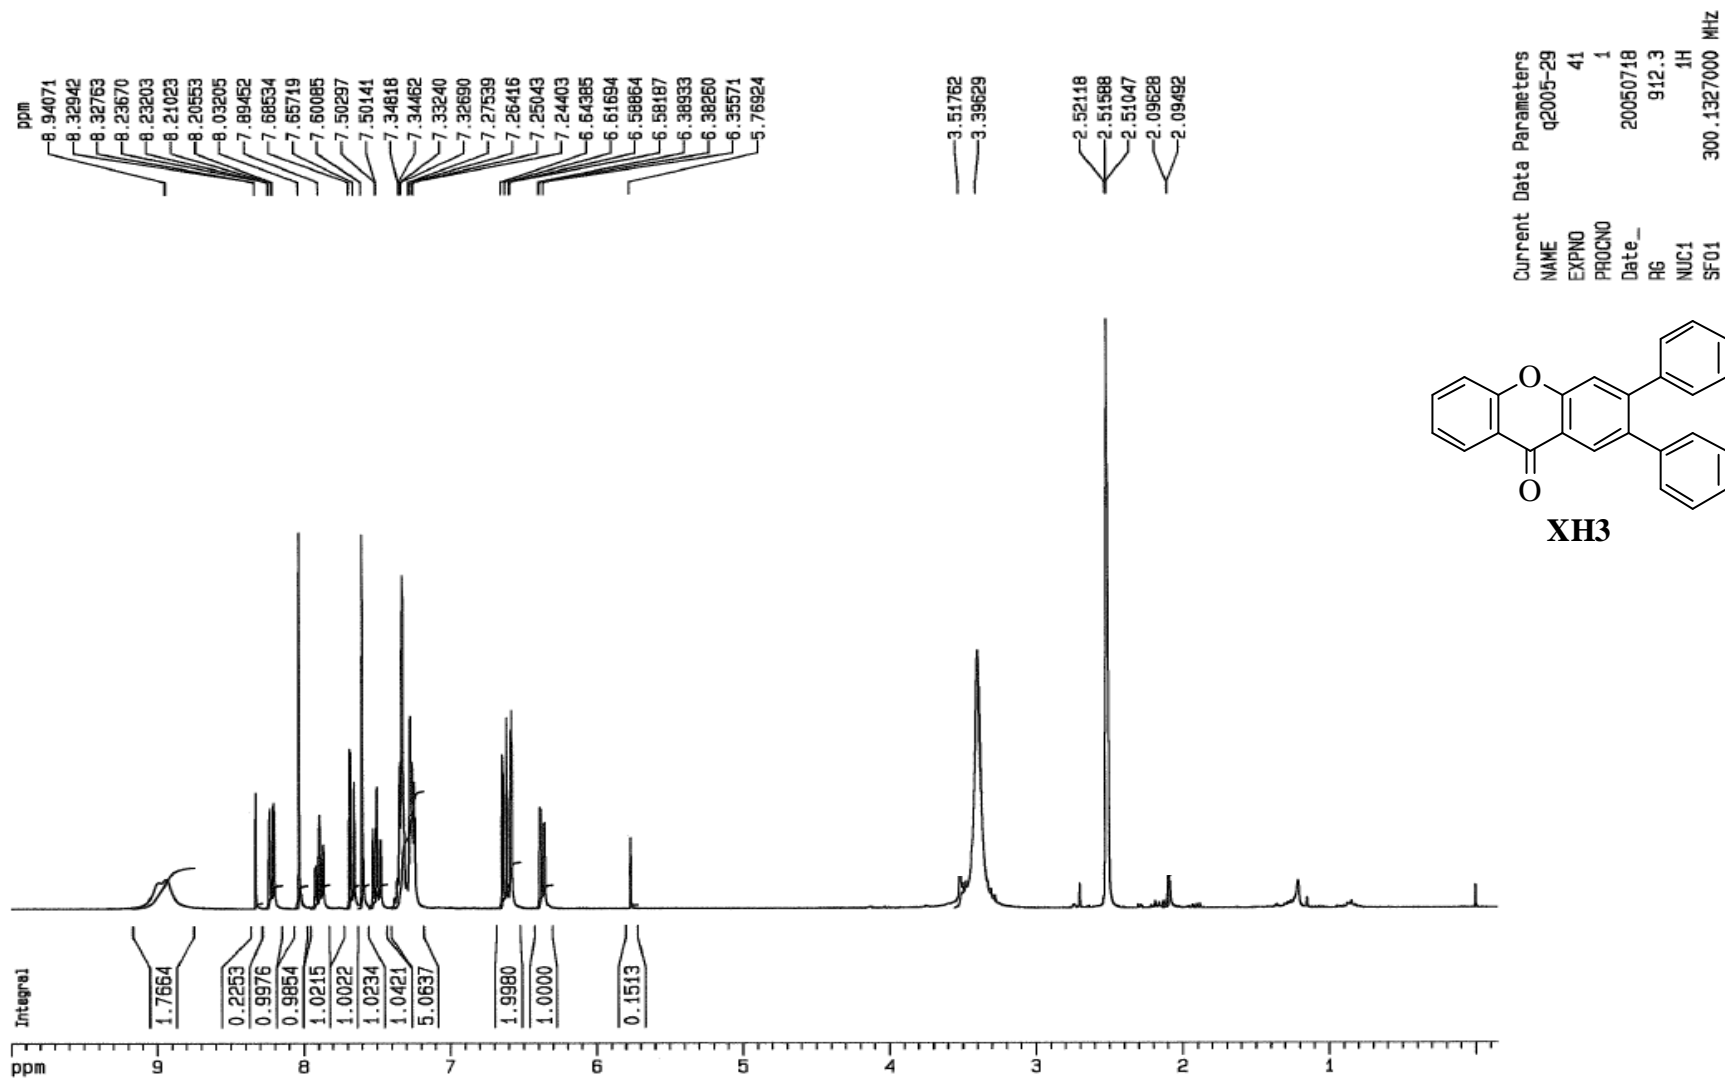

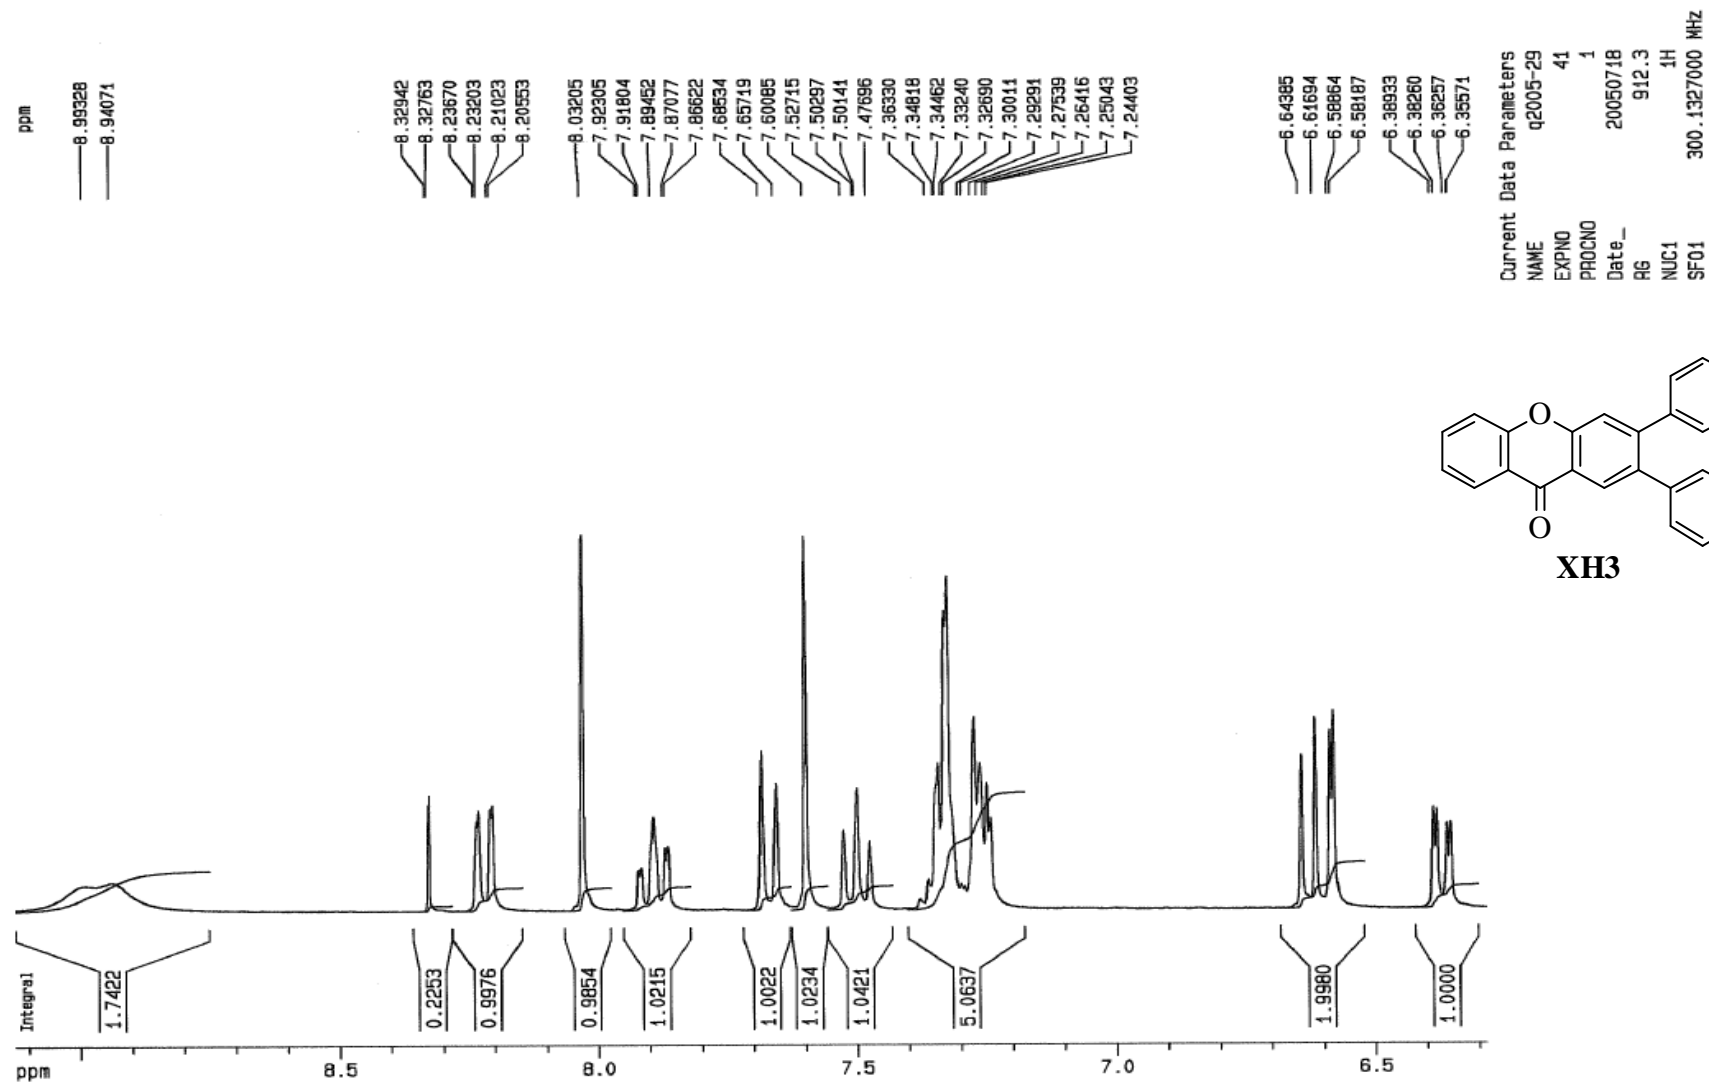

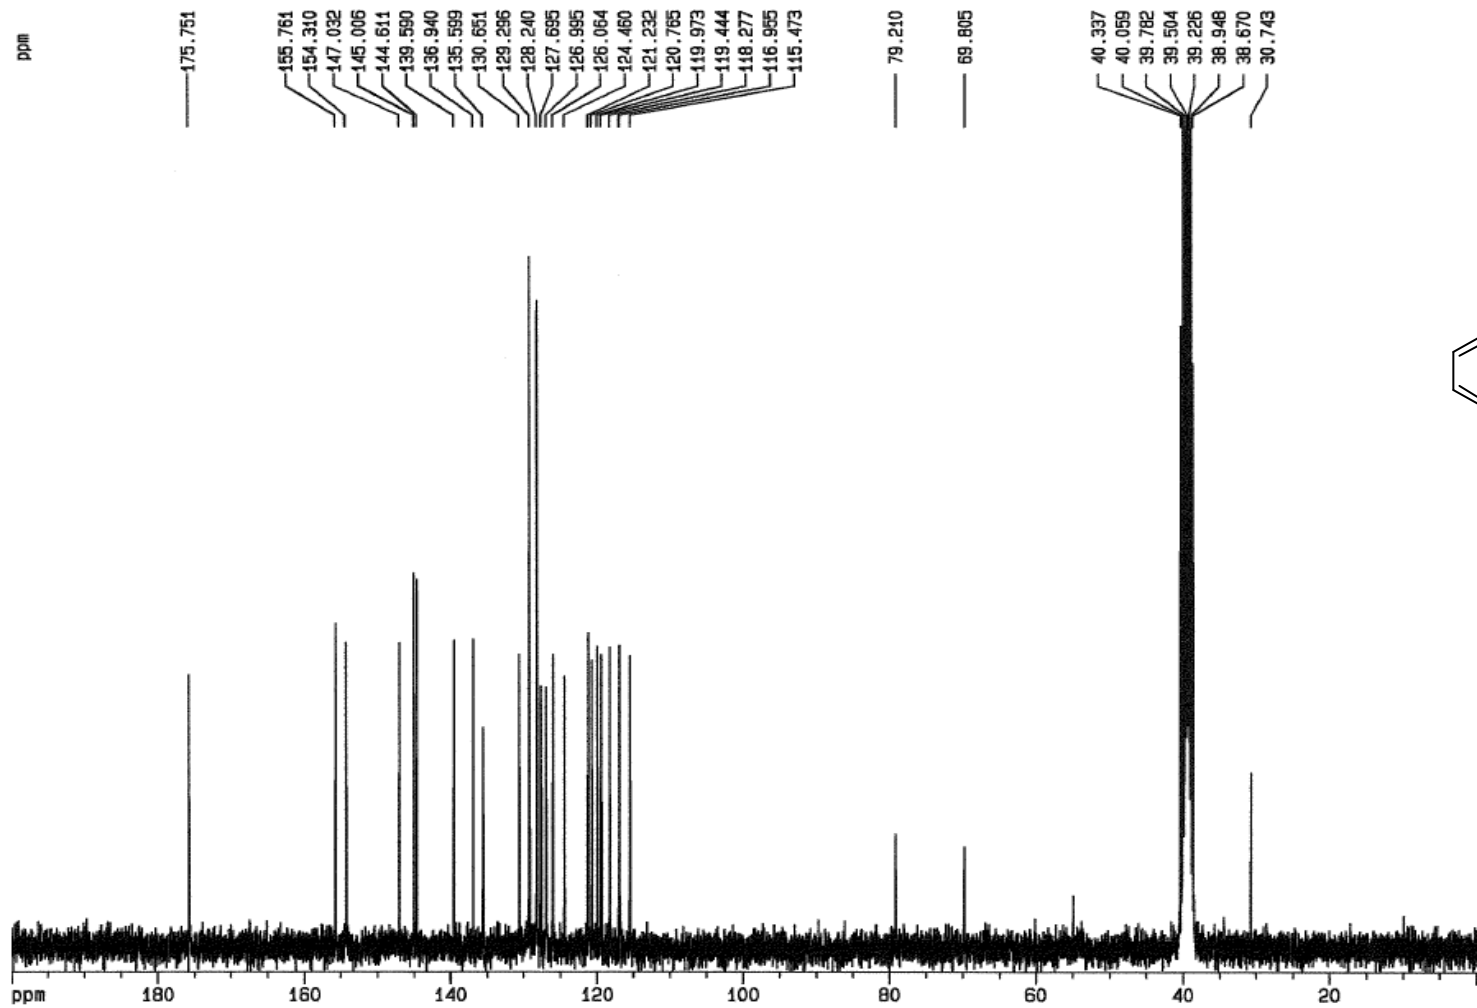

Current Data Parameters  
NAME q2005-31  
EXPNO 83  
PROCNO 1

F2 - Acquisition Parameters  
Date\_ 20050809  
Time 11.03

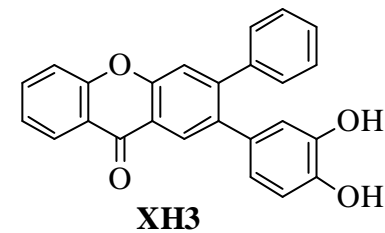

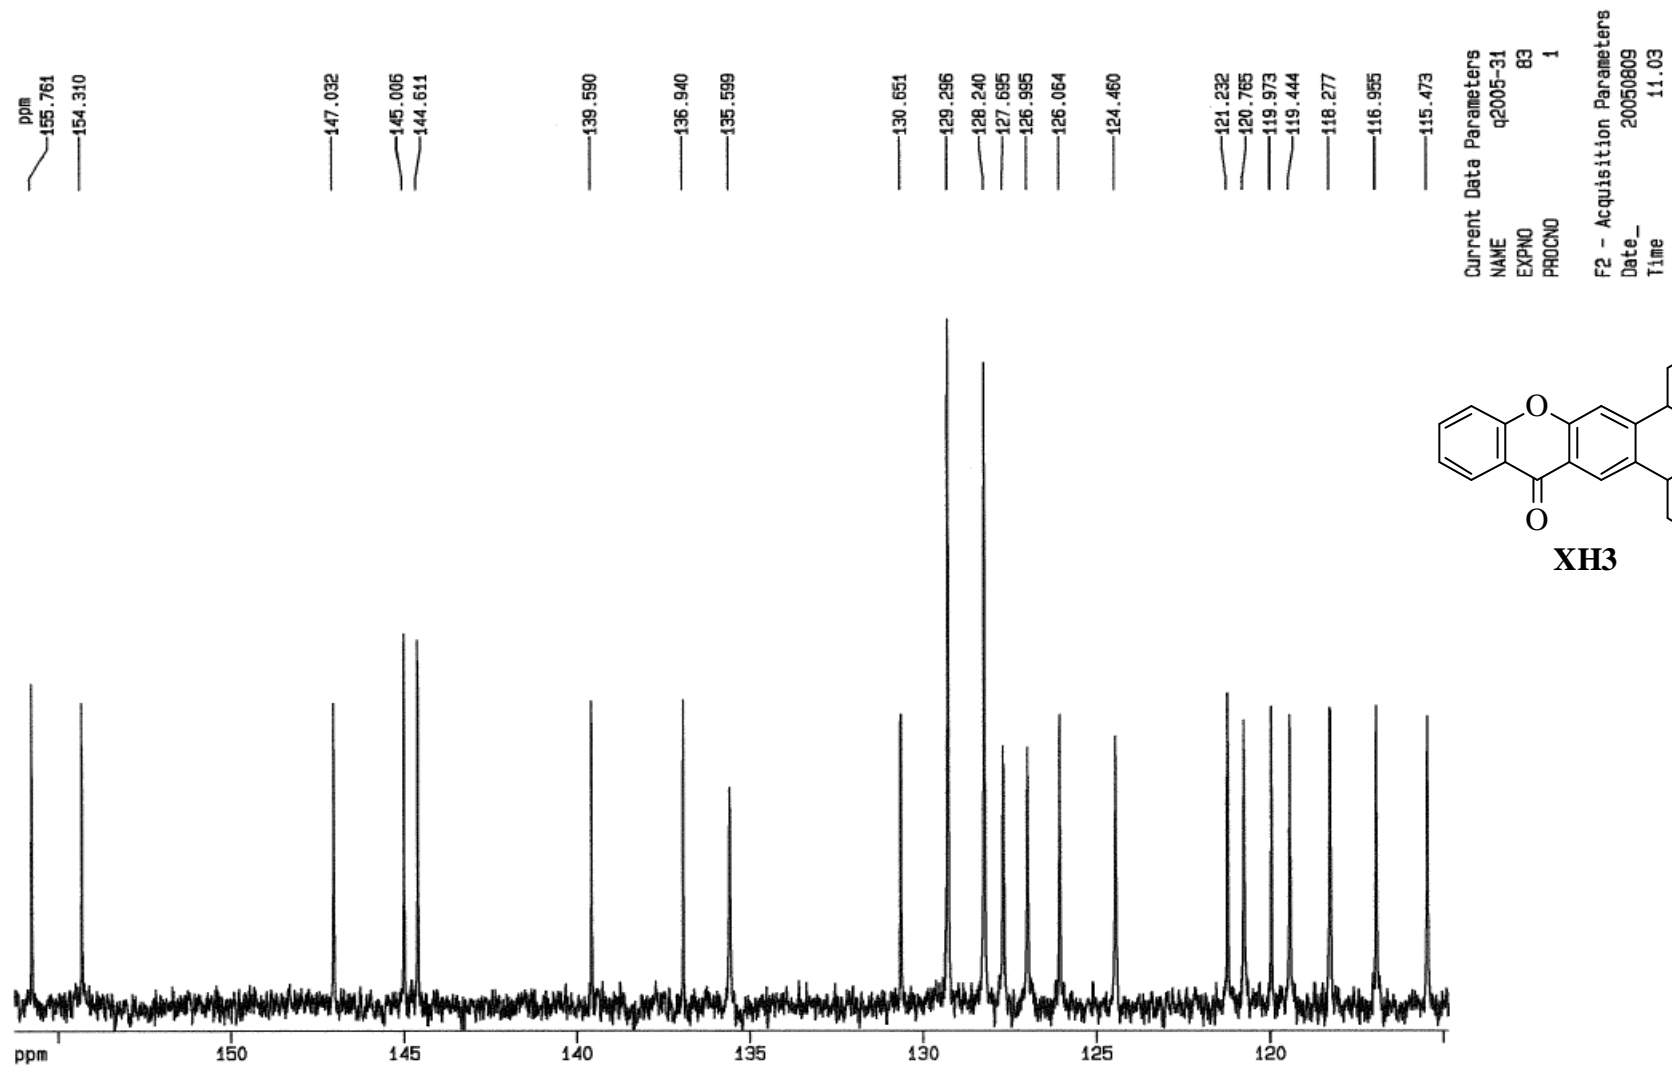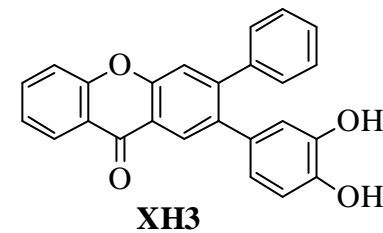

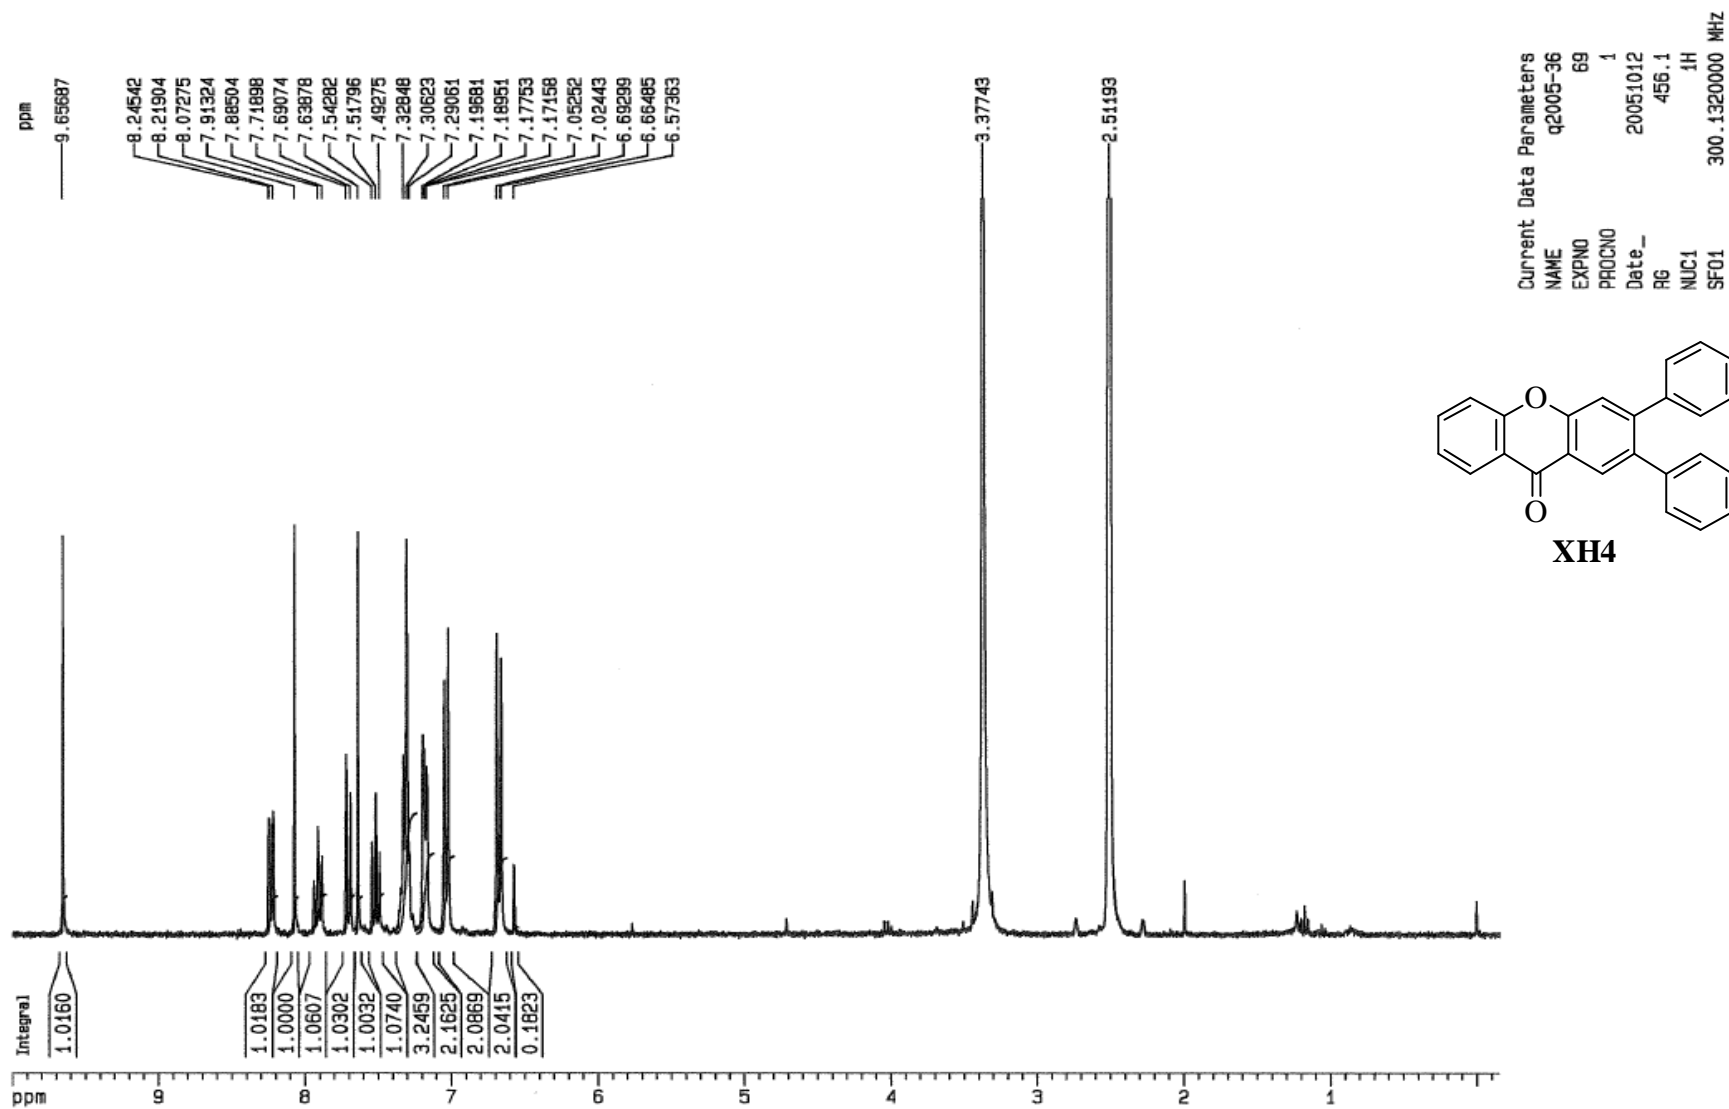



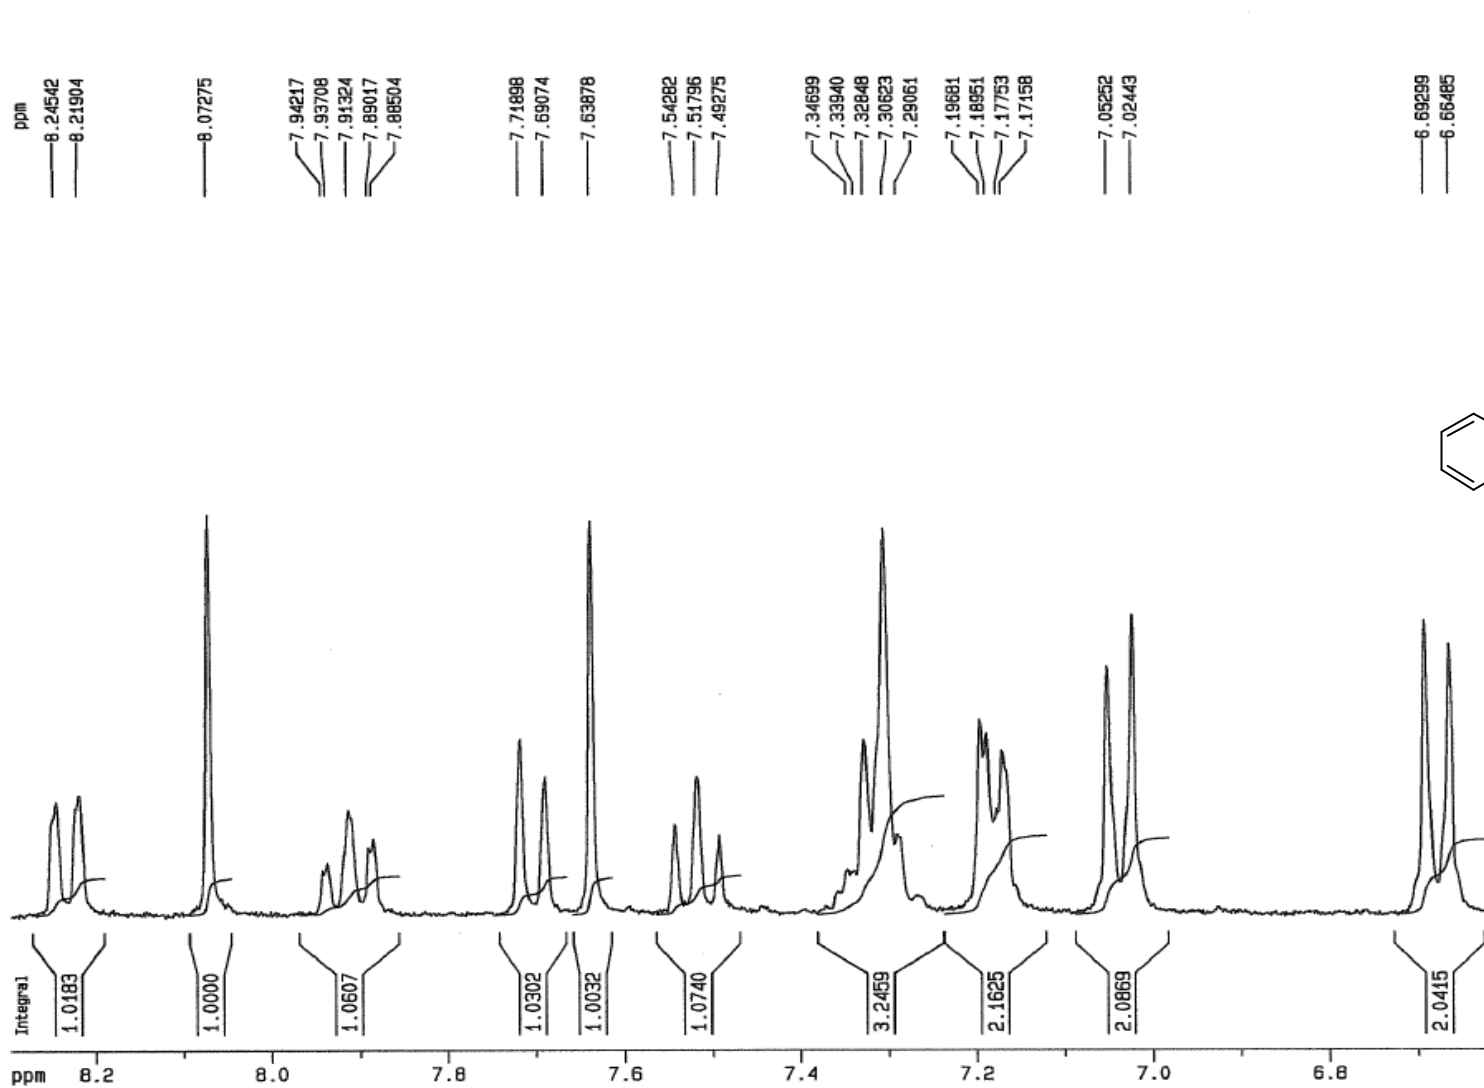

Current Data Parameters  
NAME q2005-36  
EXPNO 69  
PROCNO 1  
Date\_ 20051012  
RG 456.1  
MUC1 1H  
SF01 300.132000 MHz

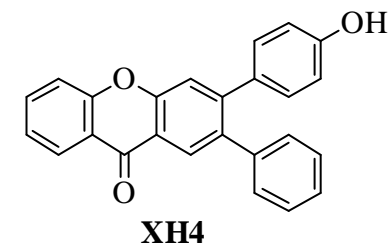

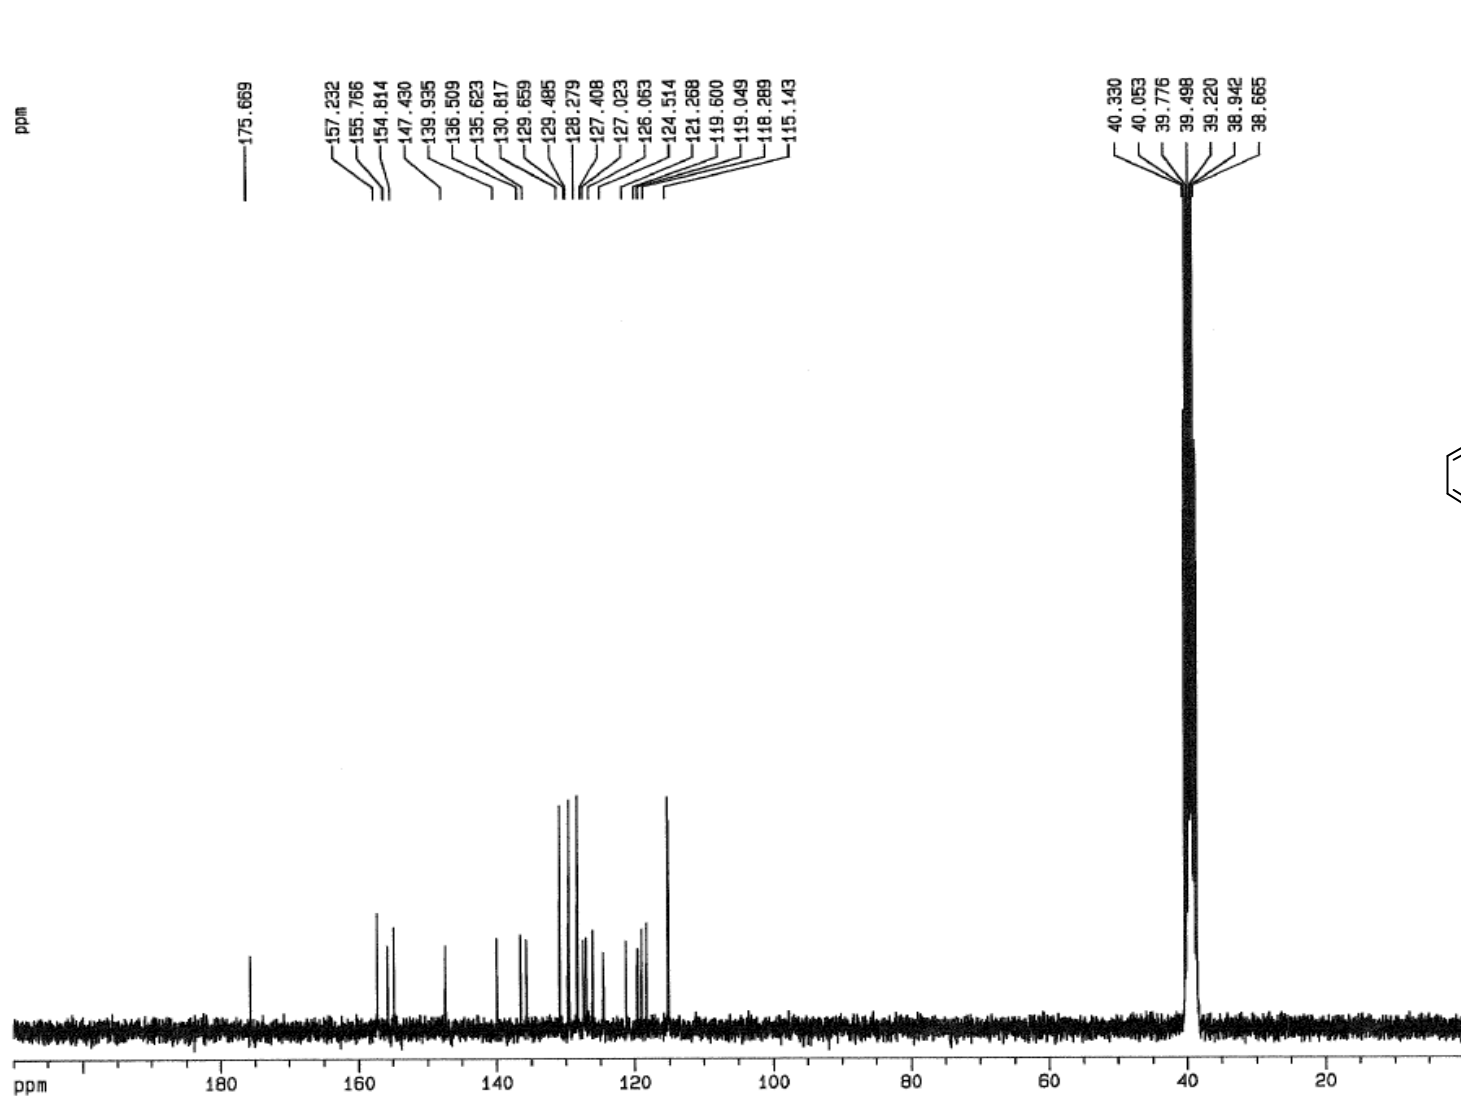

Current Data Parameters

|        |                |
|--------|----------------|
| NAME   | q2005-37       |
| EXPNO  | 50             |
| PROCNO | 1              |
| Date_  | 20051016       |
| RG     | 16384          |
| NUC1   | 13C            |
| SF01   | 75.4747190 MHz |

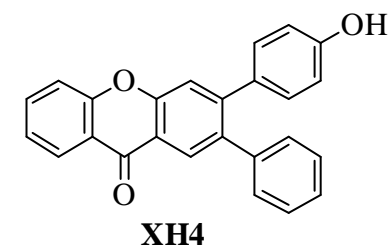

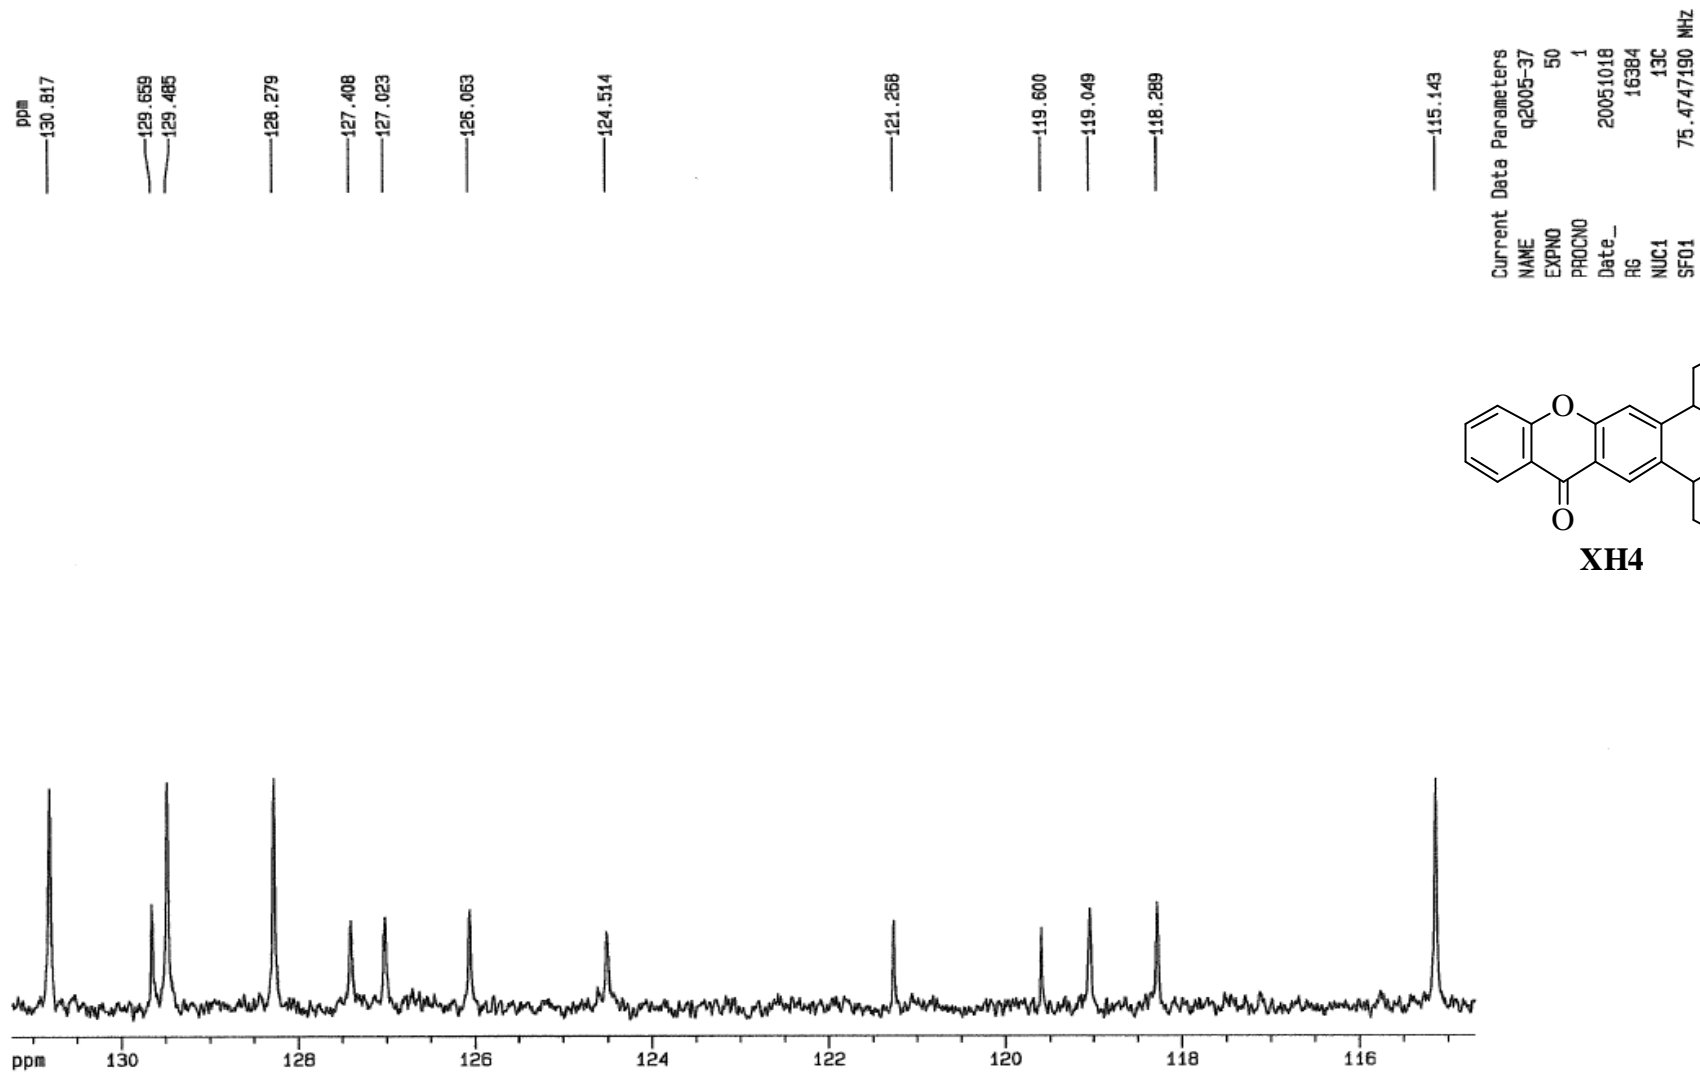

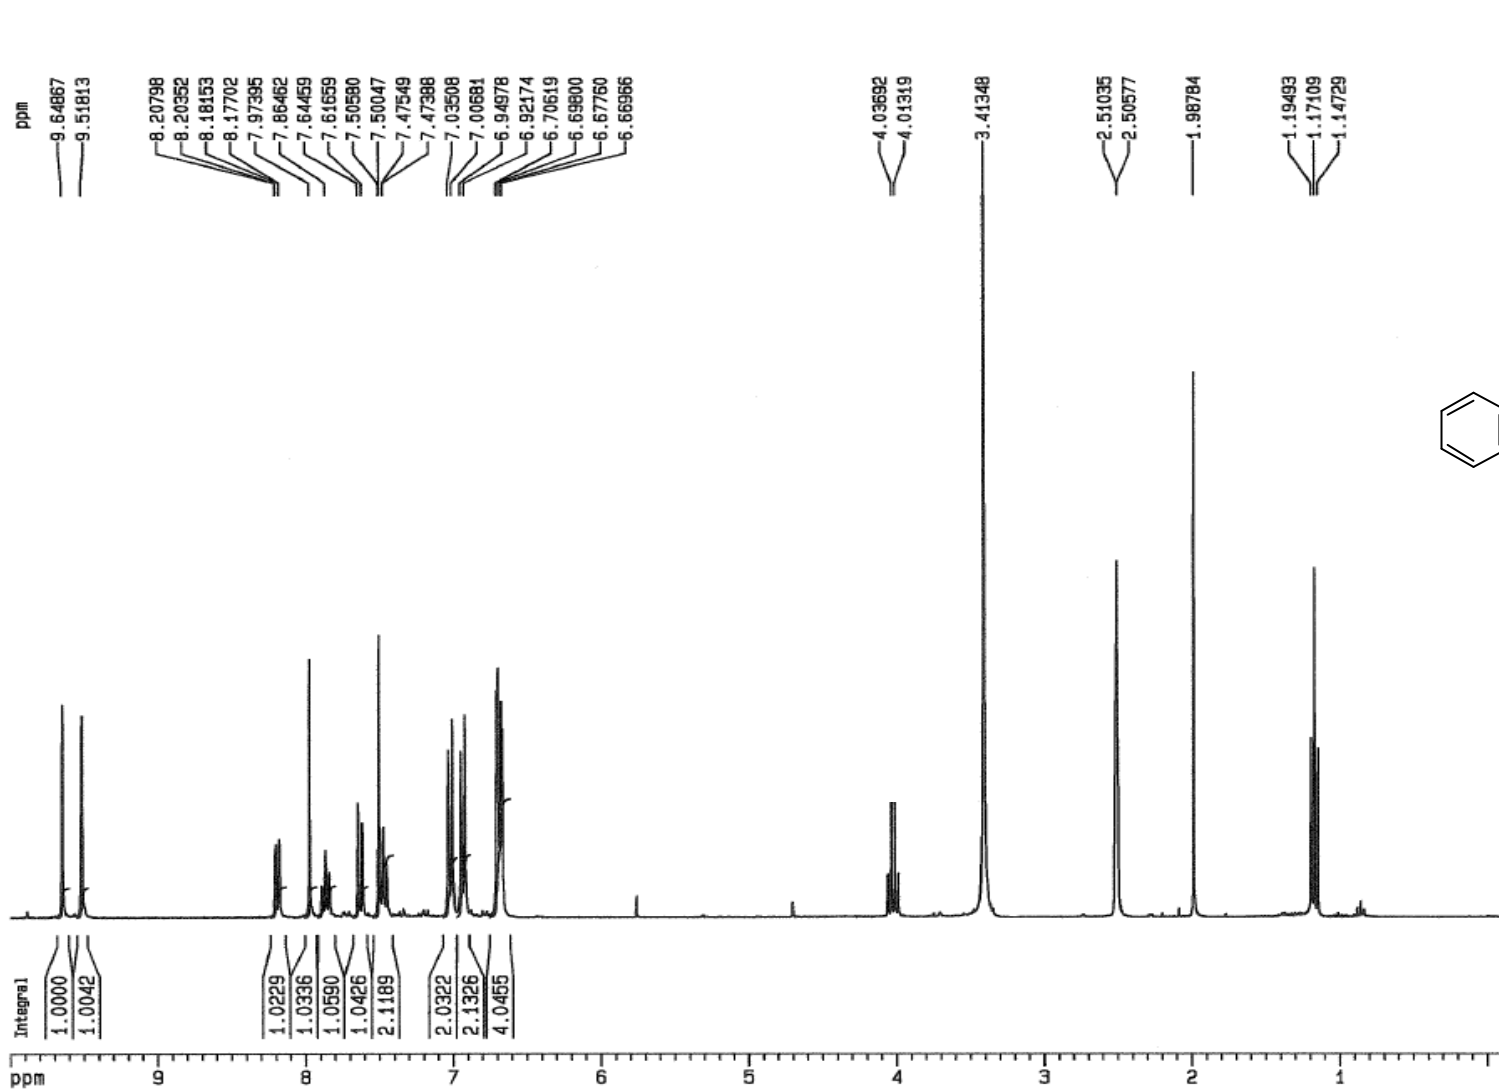

Current Data Parameters  
NAME q2005-36  
EXPNO 70  
PROCNO 1  
Date\_ 20051012  
RG 574.7  
NUC1 1H  
SFO1 300.132000 MHz

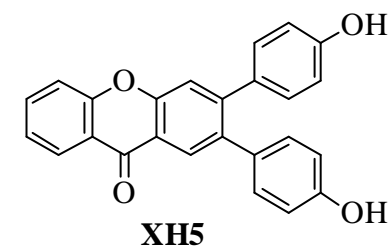

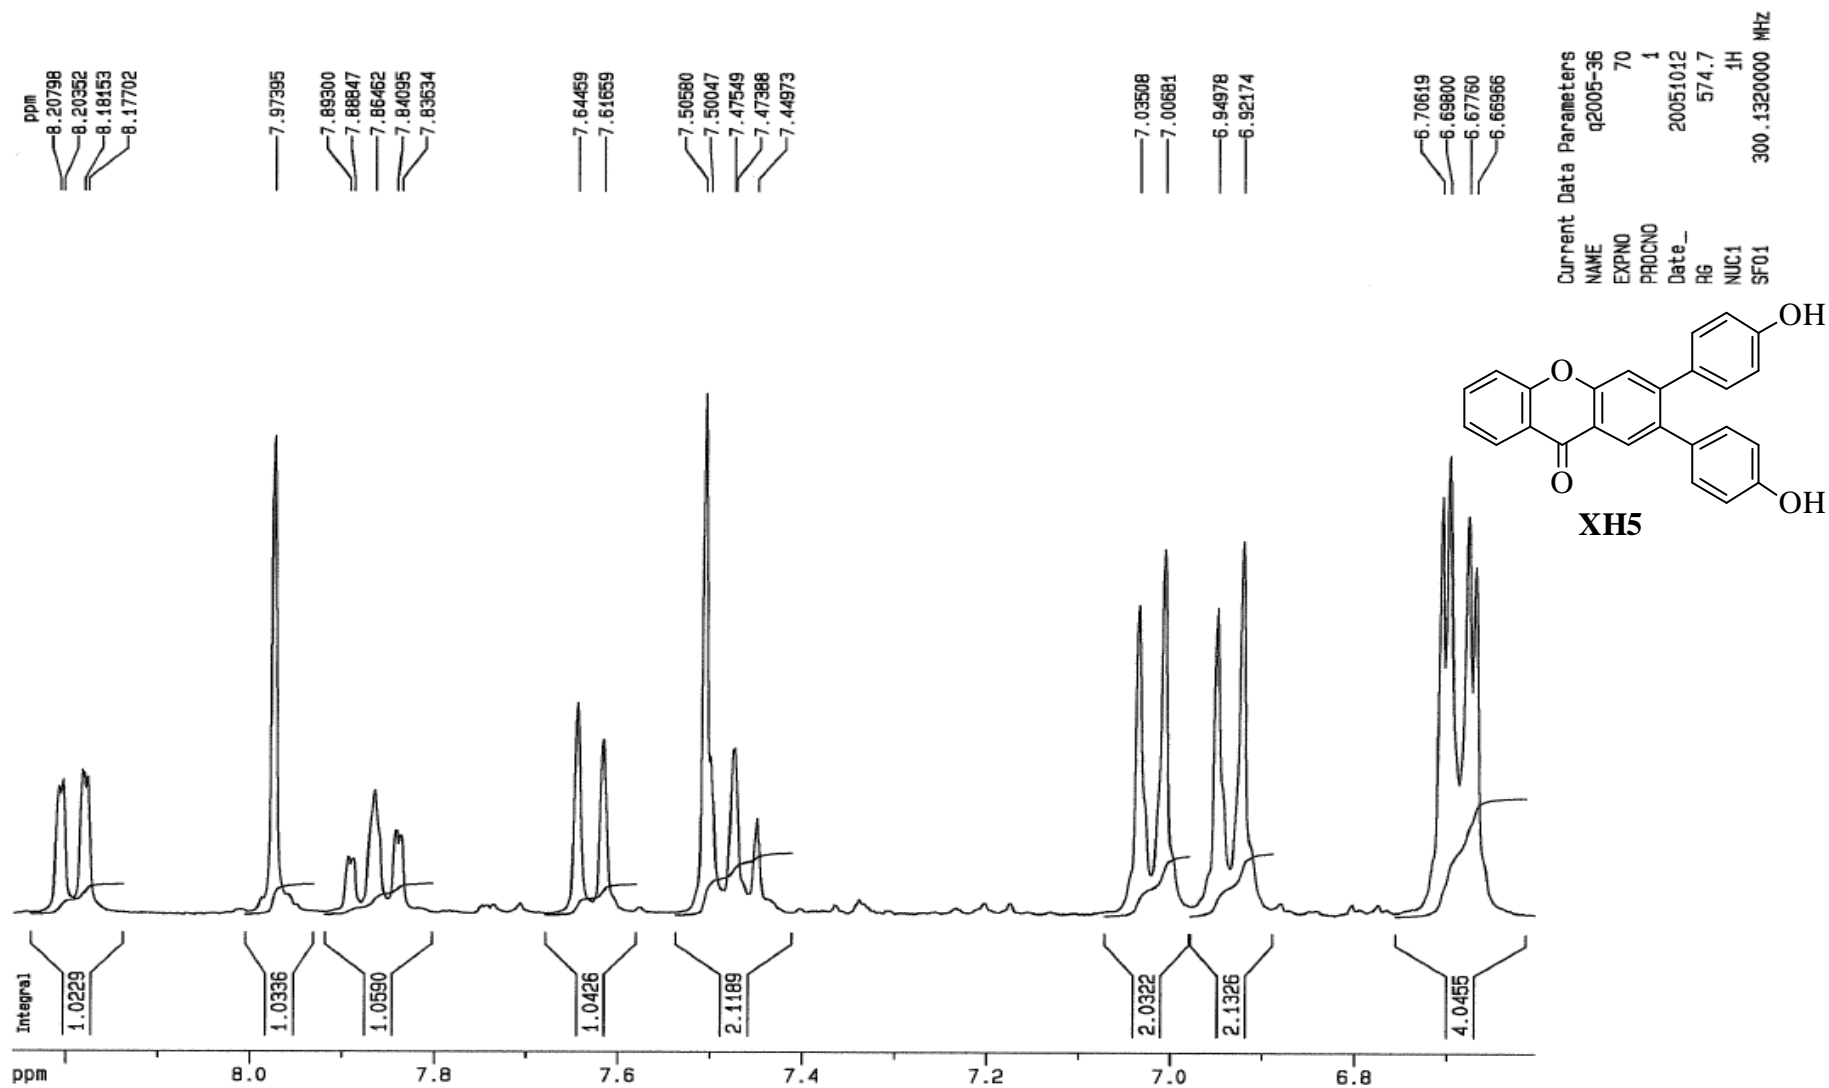

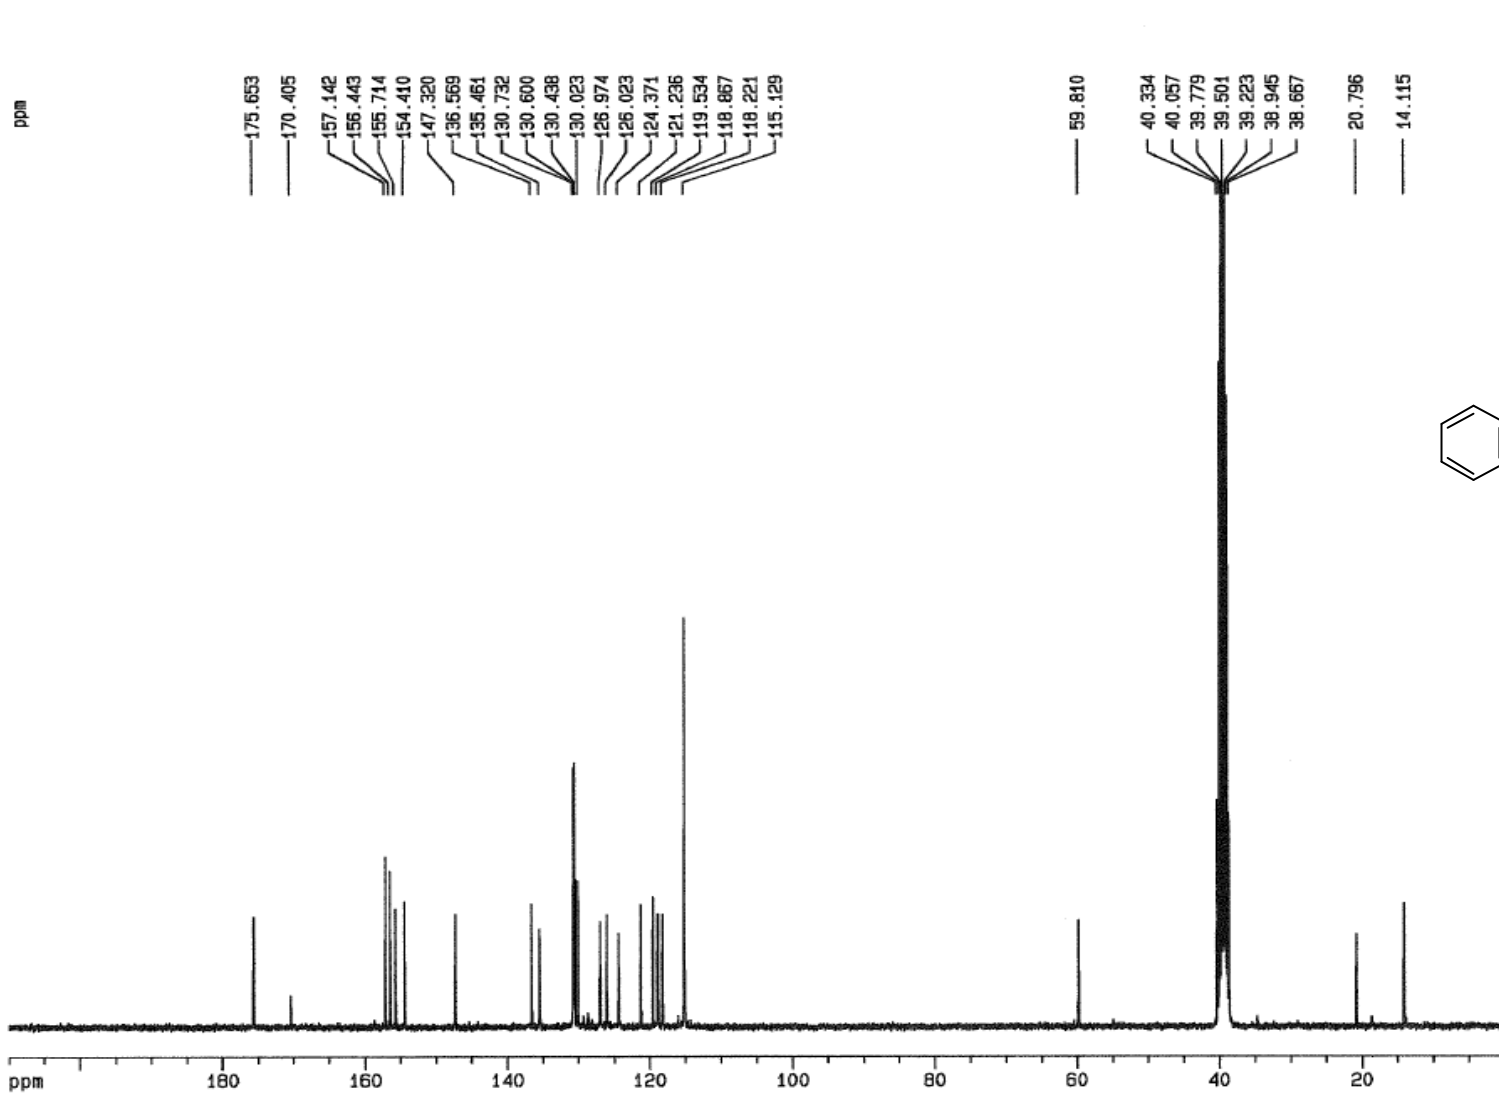

Current Data Parameters  
NAME q2005-37  
EXPNO 92  
PROCNO 1

F2 - Acquisition Parameters  
Date\_ 20051020  
Time 17.58

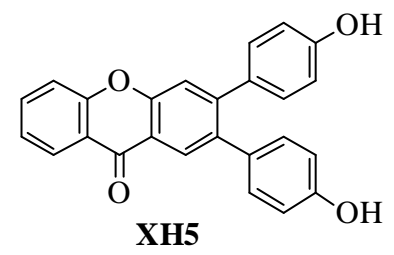

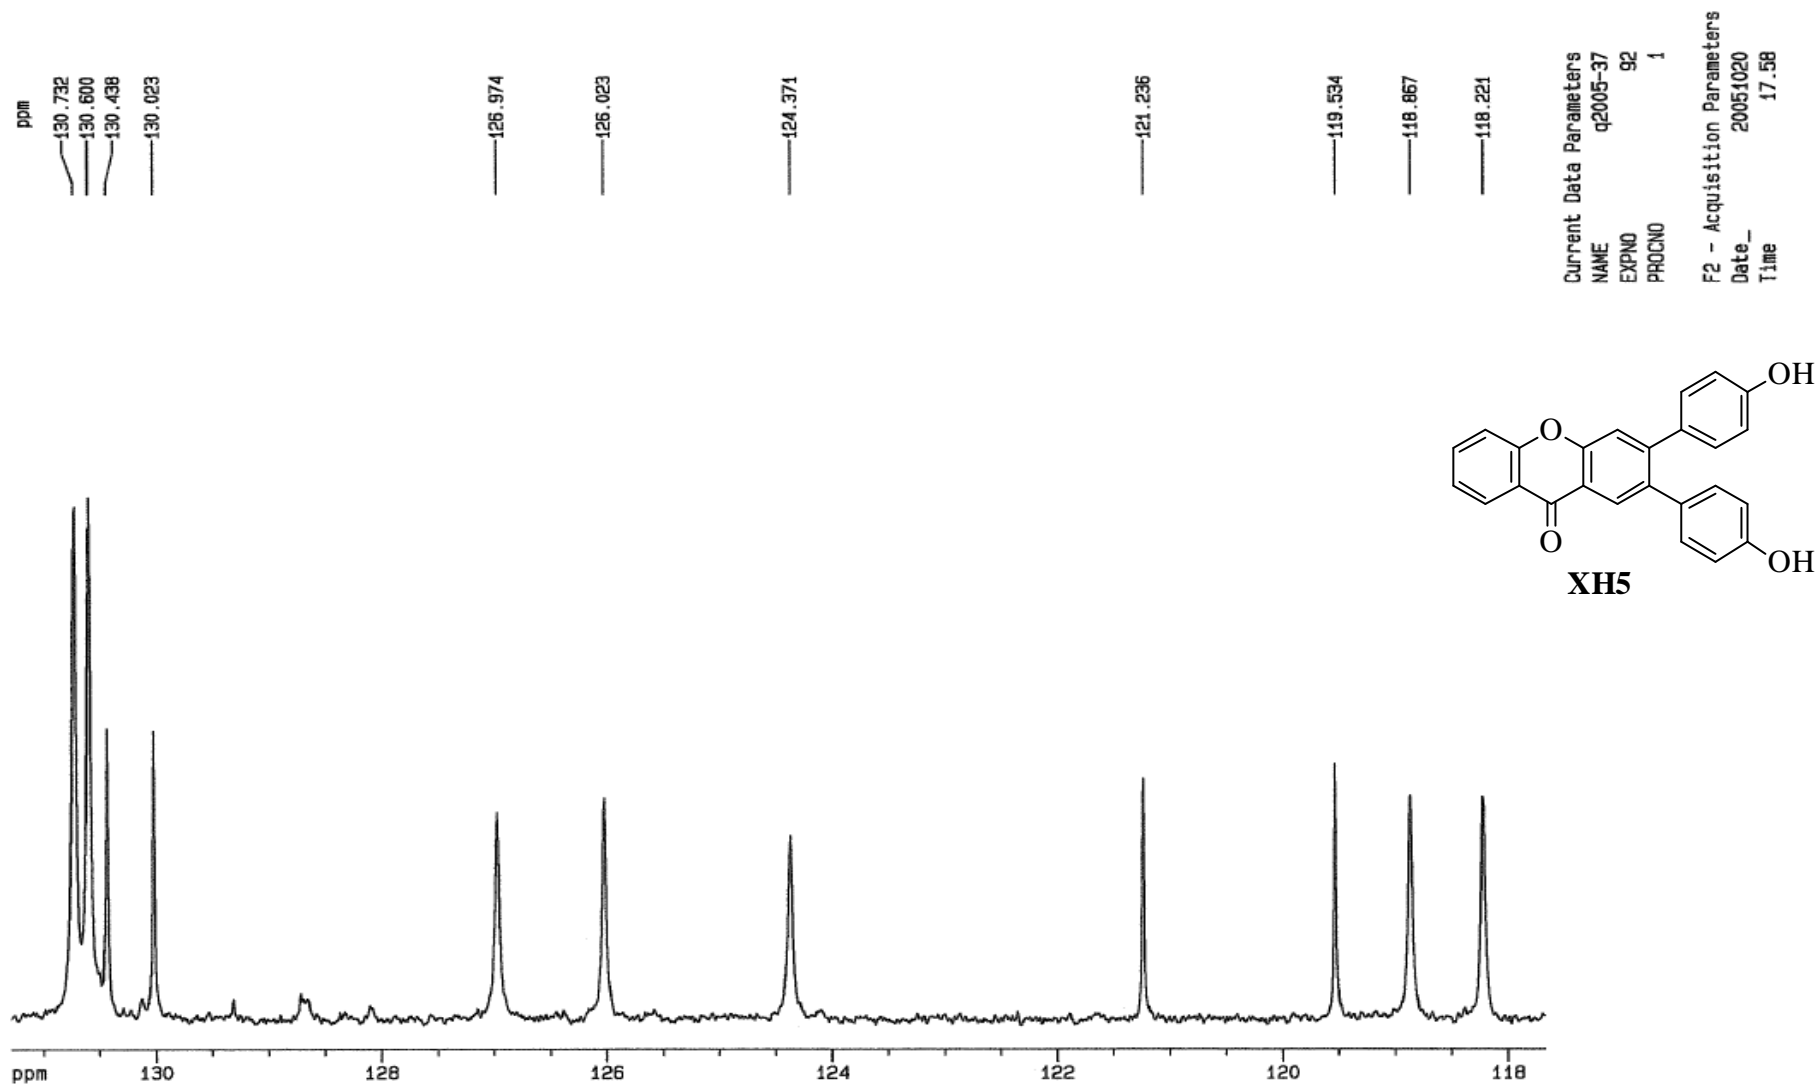

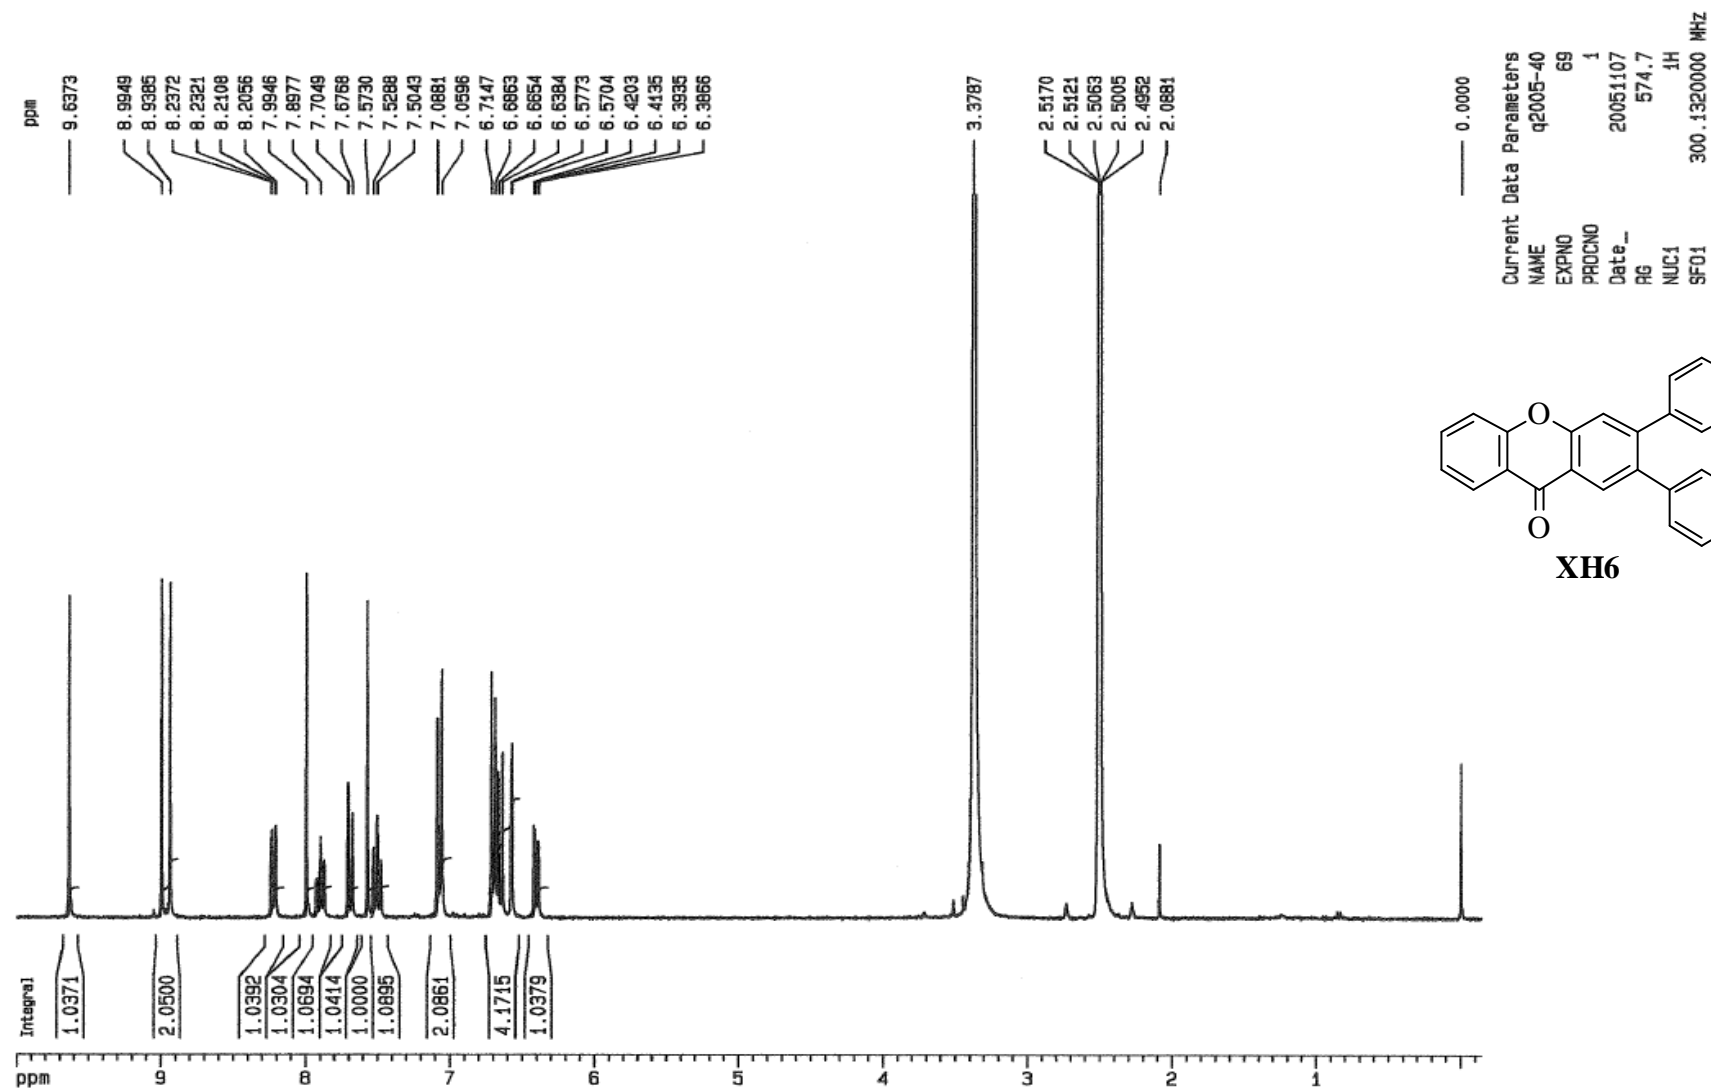



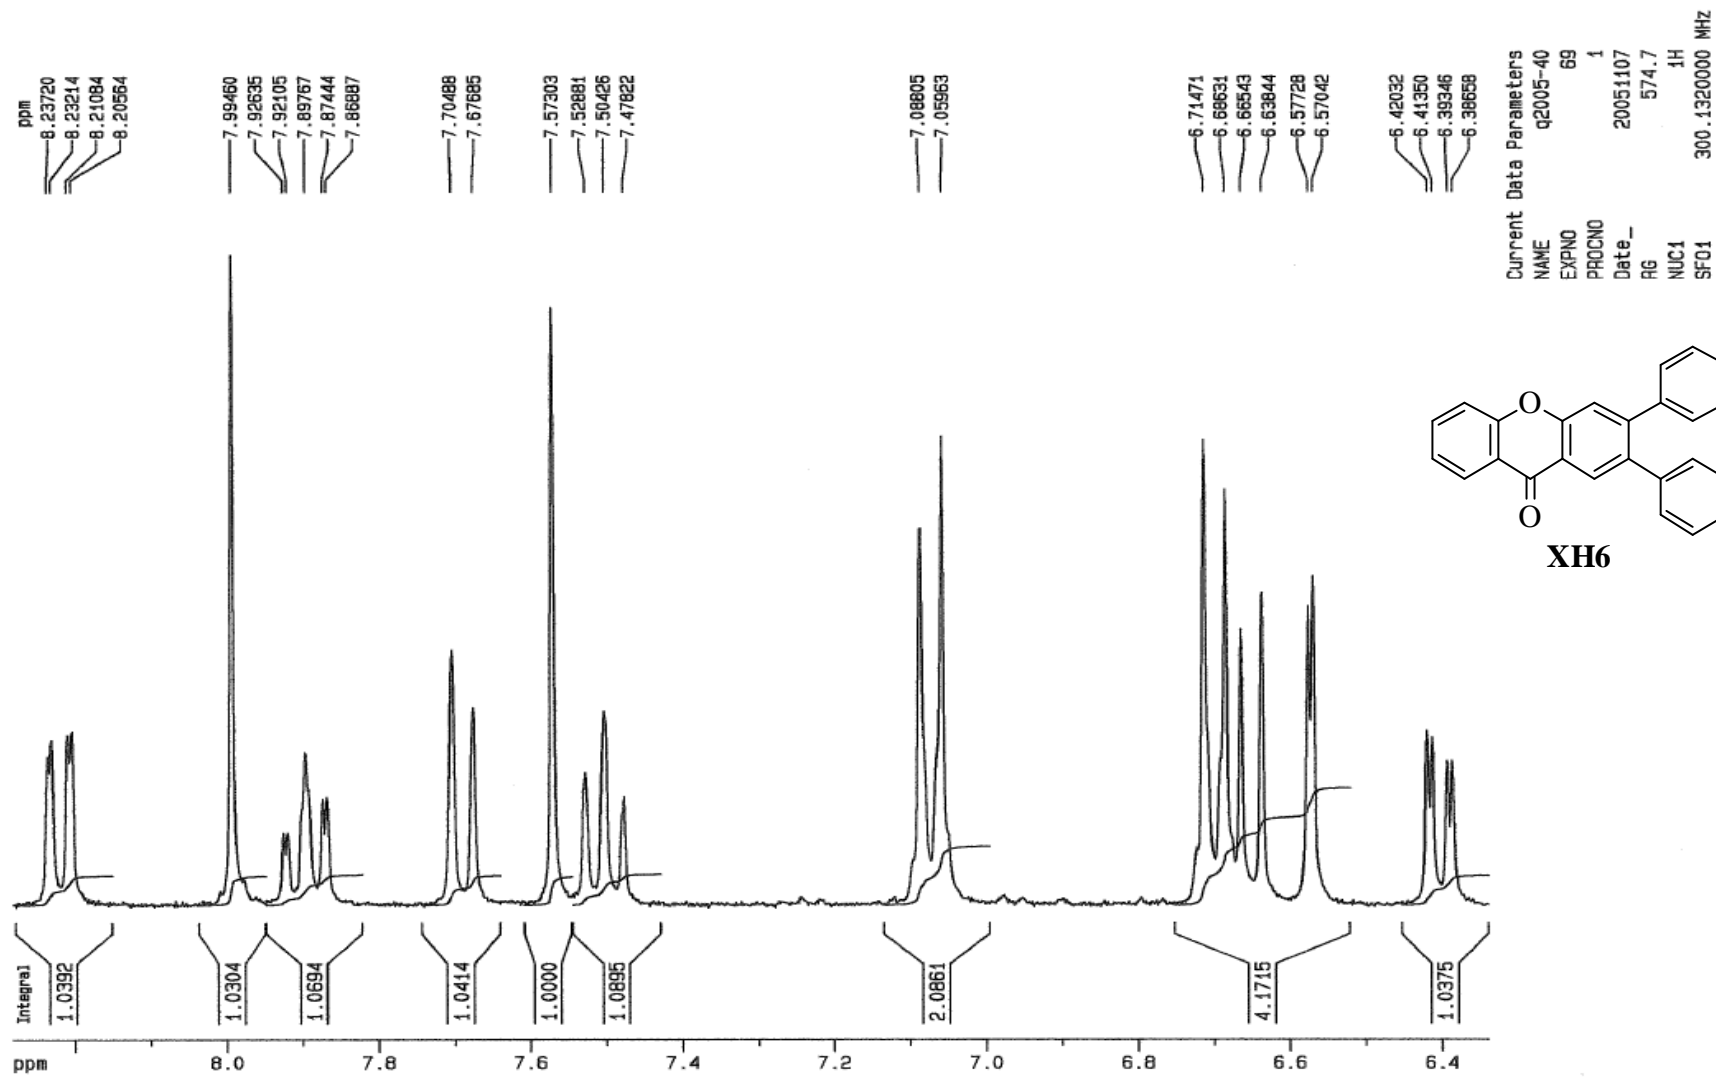

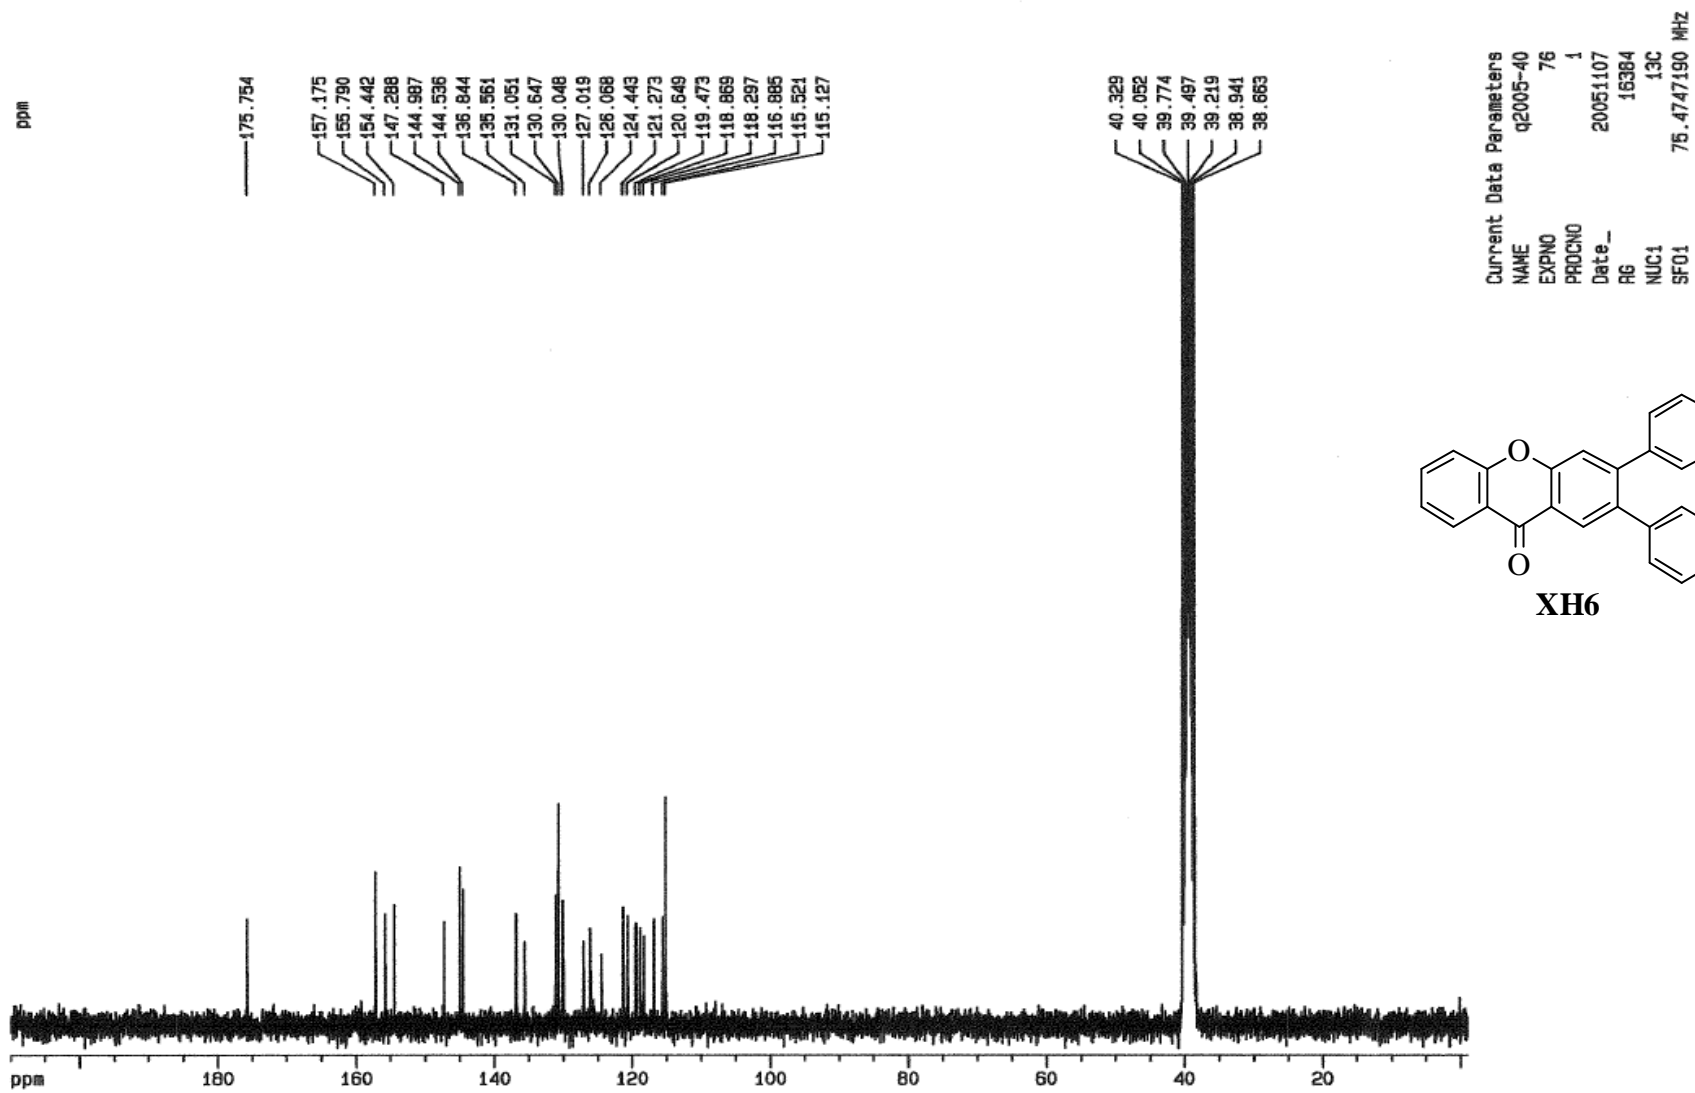

ppm  
147.268

144.987  
144.536

136.844  
135.561

131.051  
130.647  
130.048

127.019  
126.068  
124.443

121.273  
120.649

119.473  
118.869  
118.297

116.885  
115.521  
115.127

Current Data Parameters  
NAME Q2005-40  
EXPNO 76  
PROCNO 1  
Date\_ 20051107  
RG 16384  
NUC1 13C  
SFO1 75.4747190 MHz

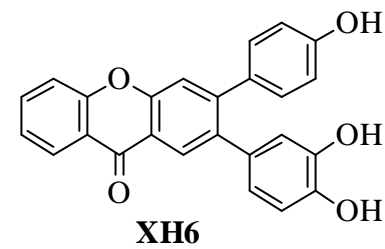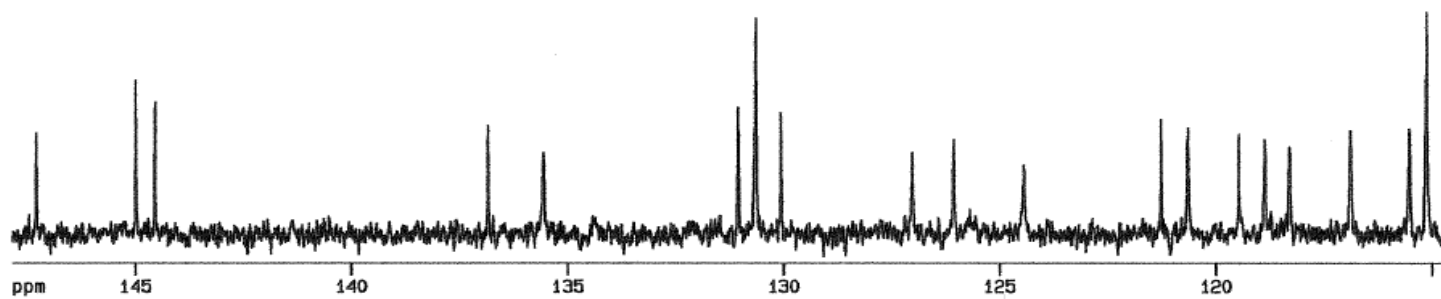

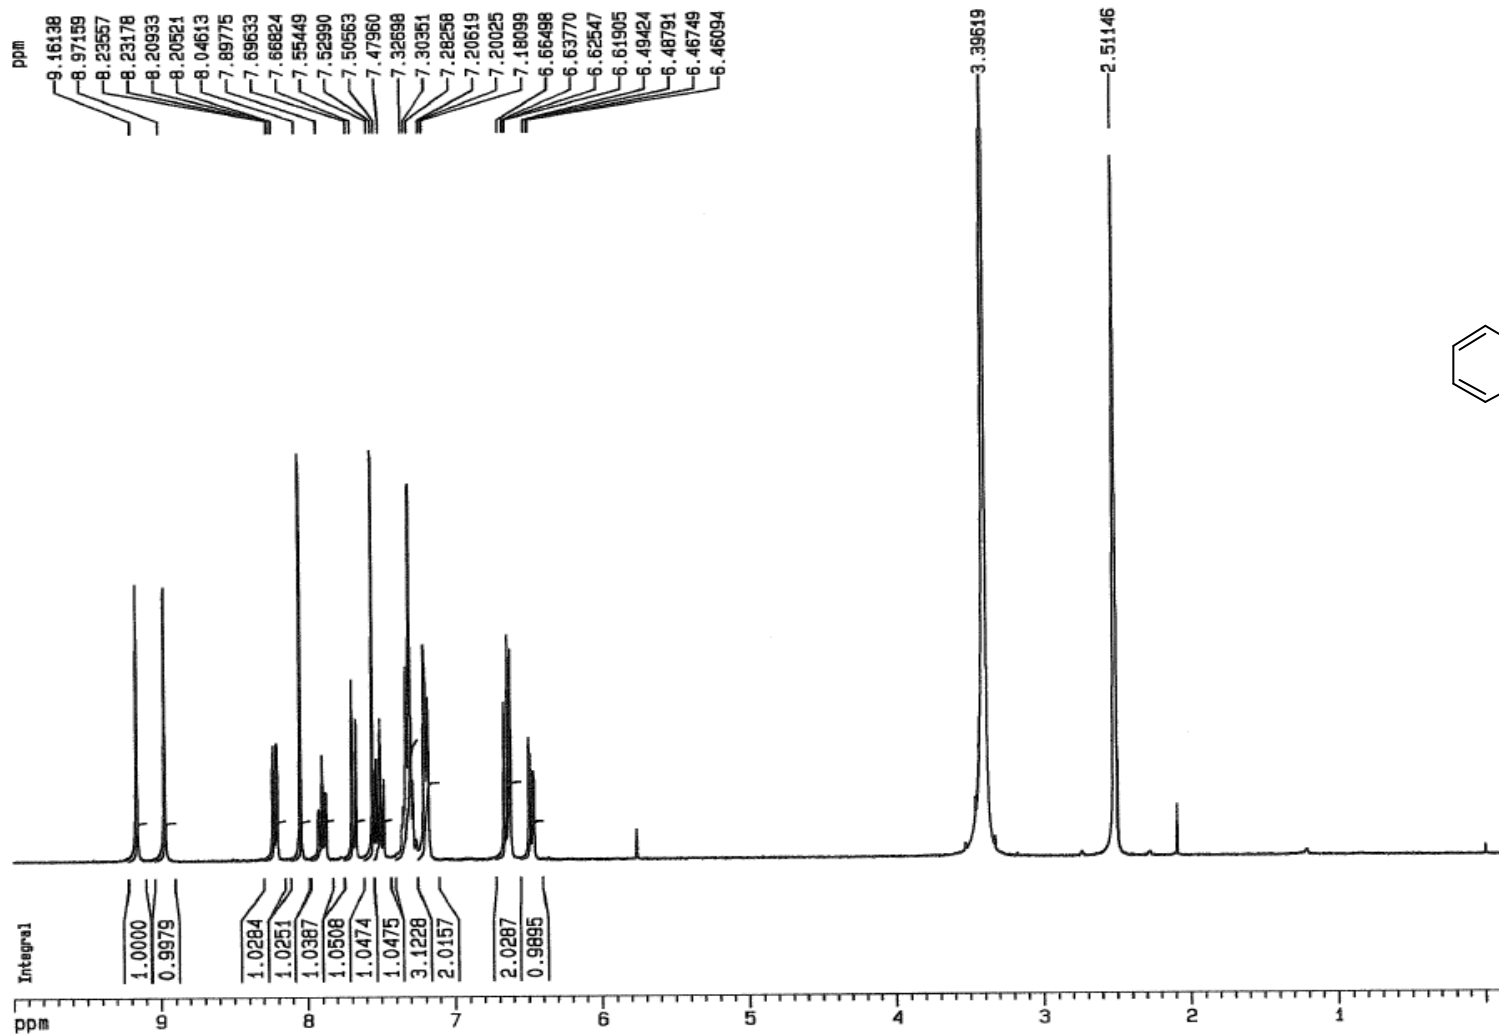

Current Data Parameters  
NAME q2006-56  
EXPNO 56  
PROCNO 1  
Date\_ 20061031  
RG 1149.4  
NUC1 1H  
SF01 300.132000 MHz

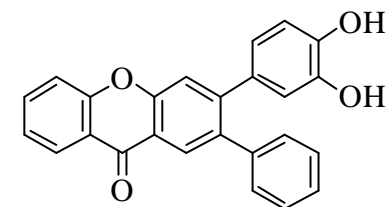

**XH7**

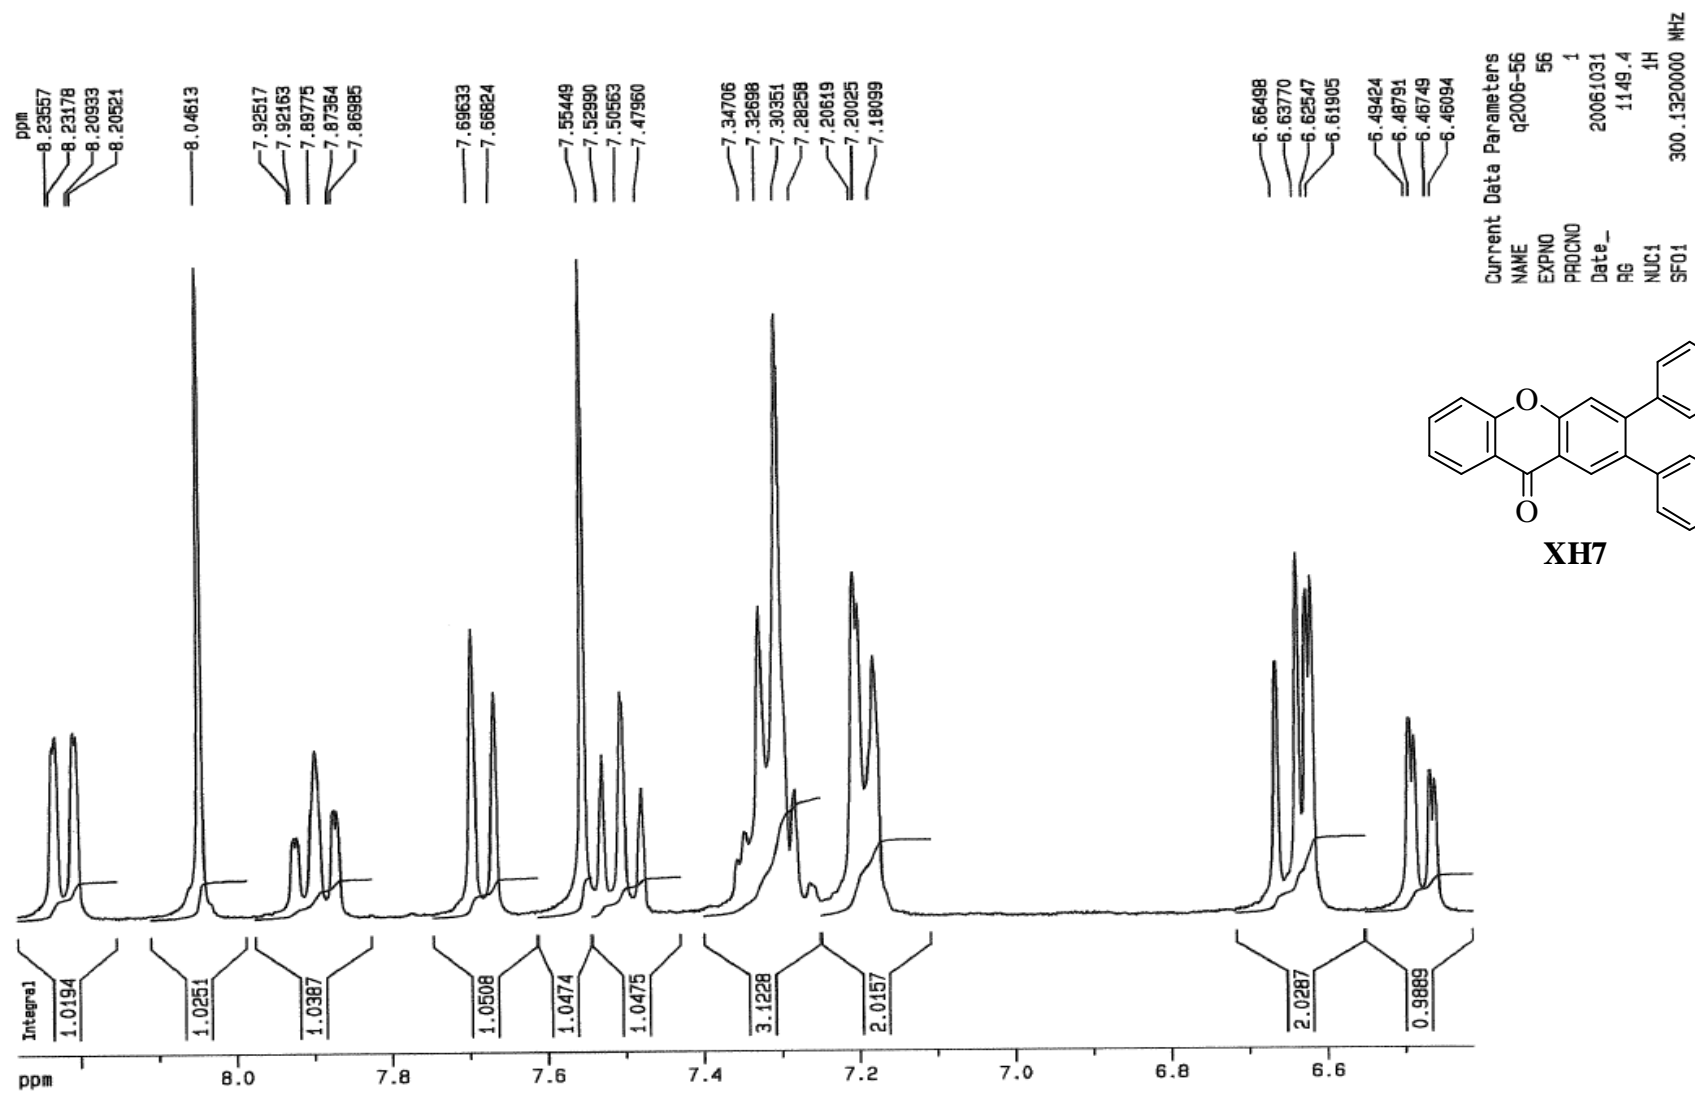

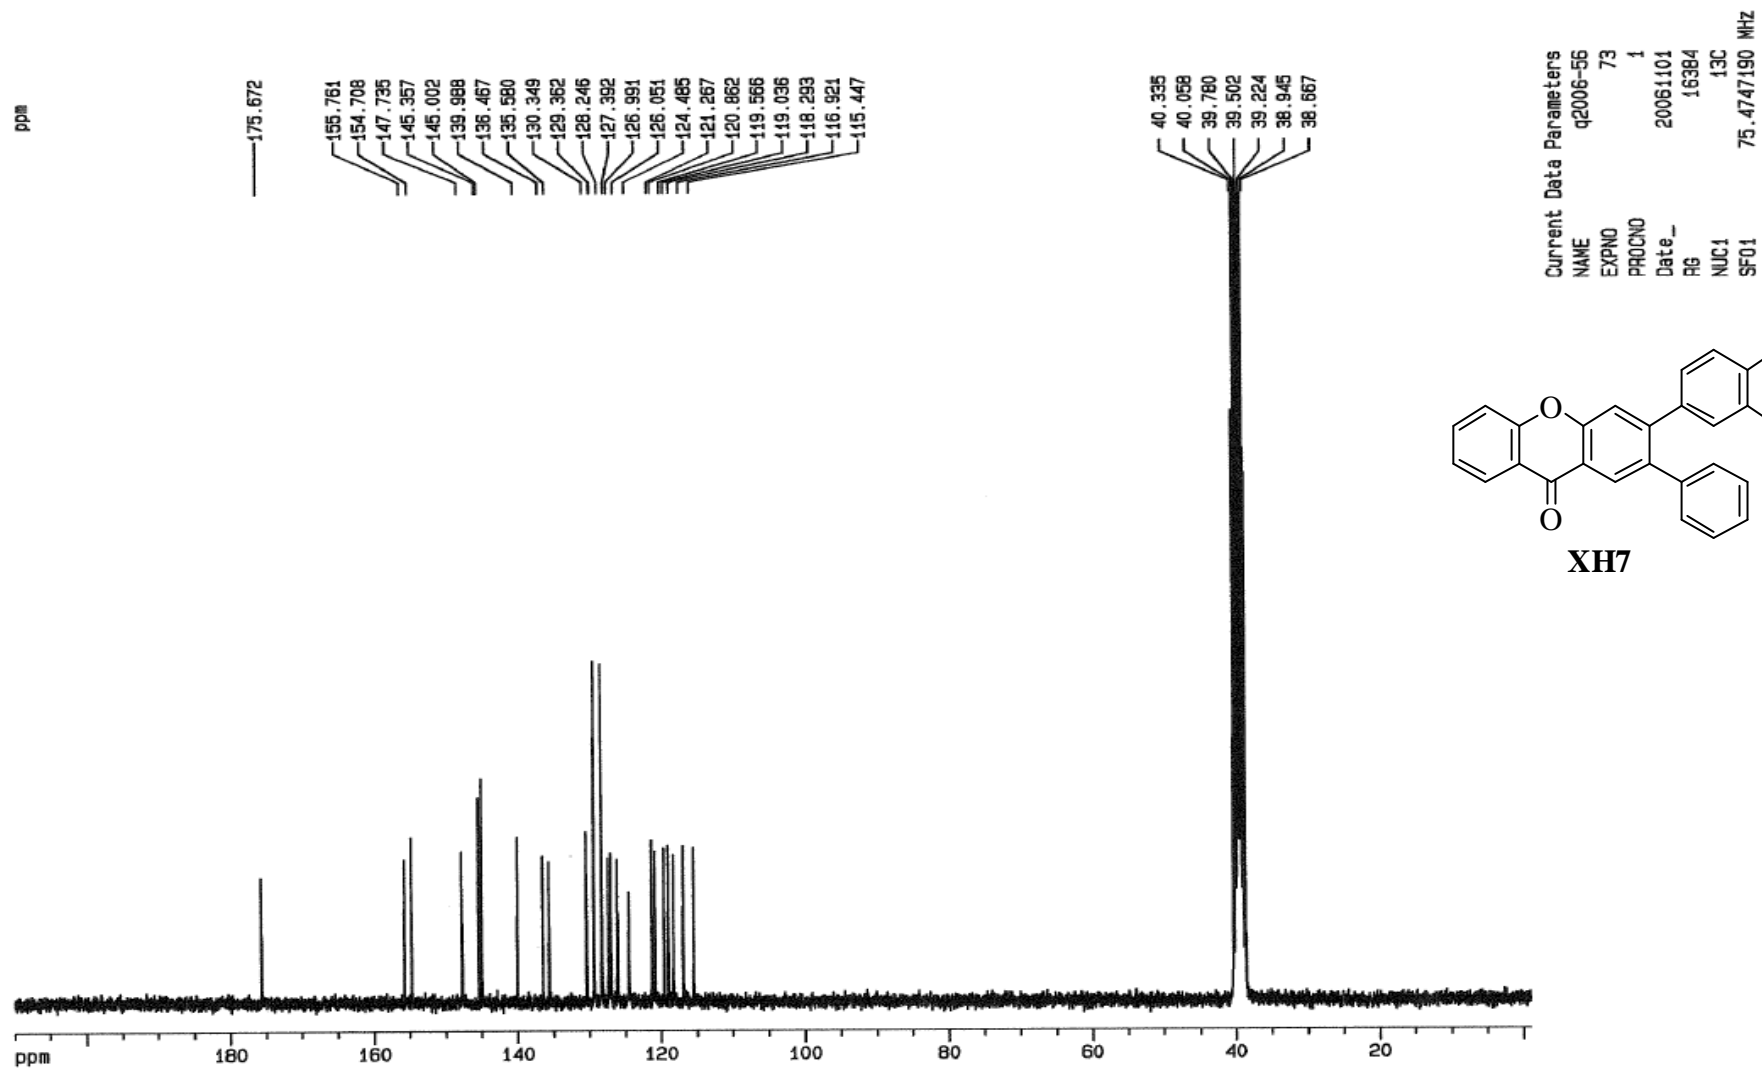

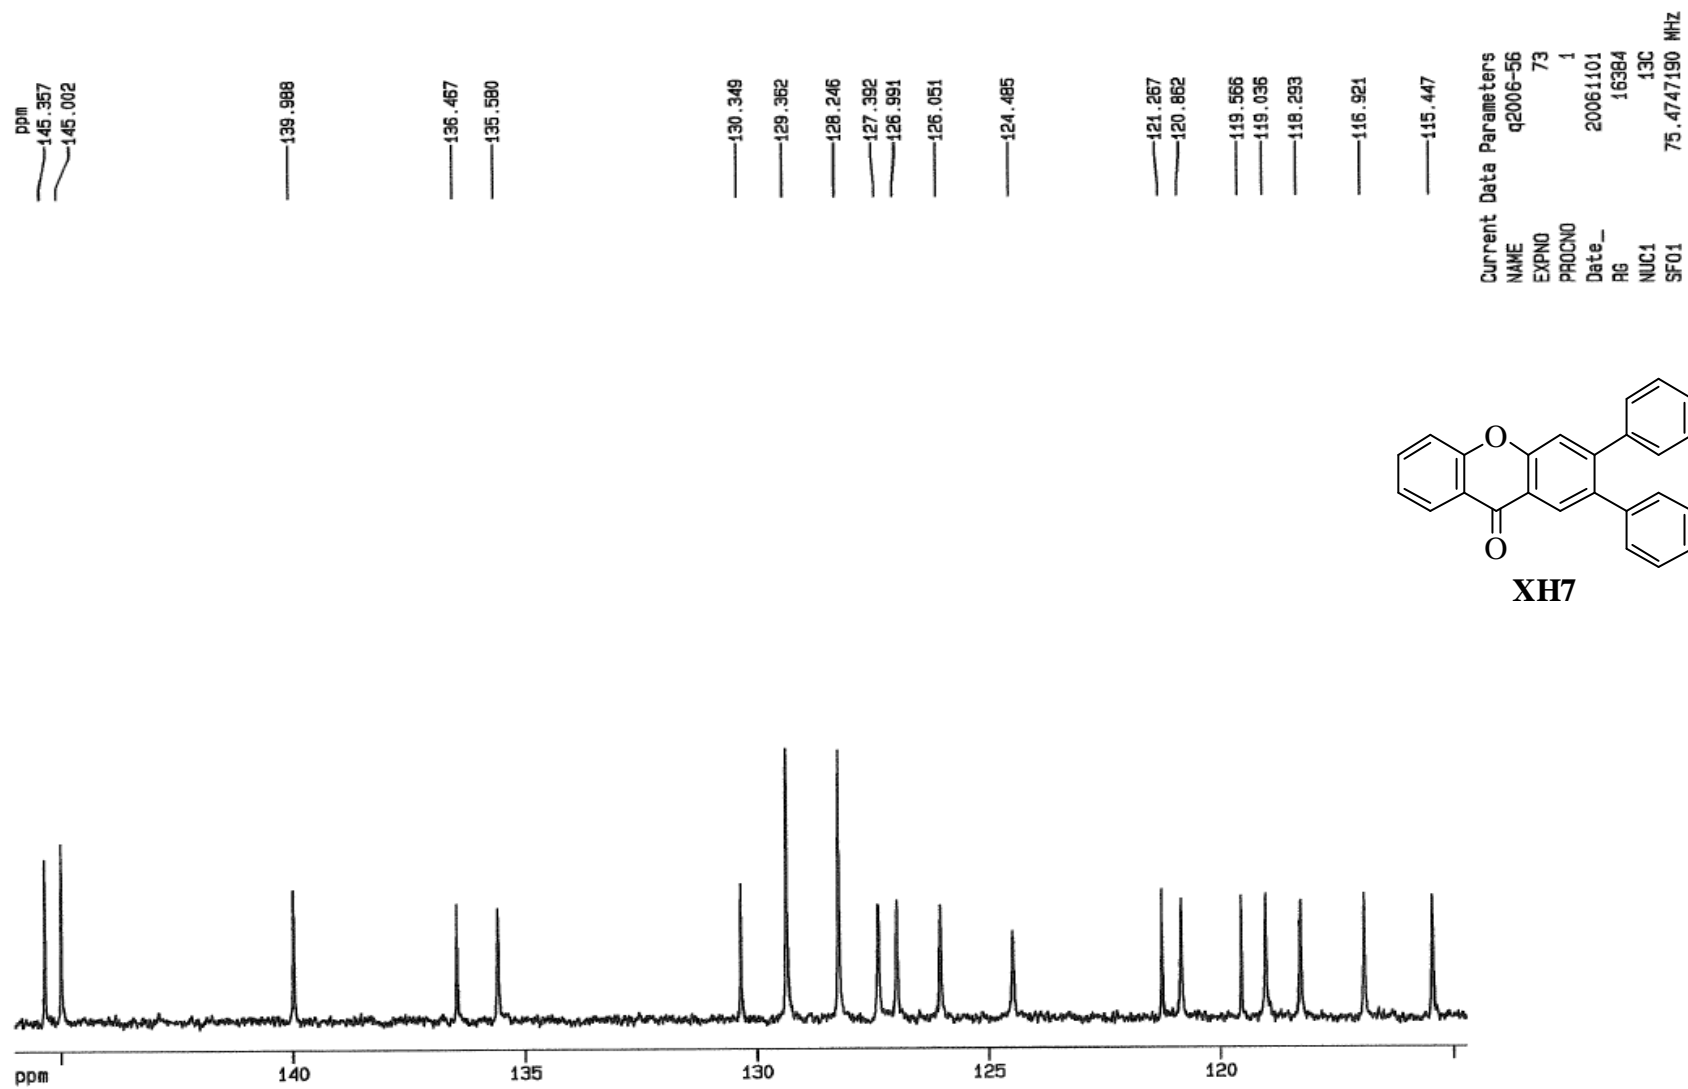

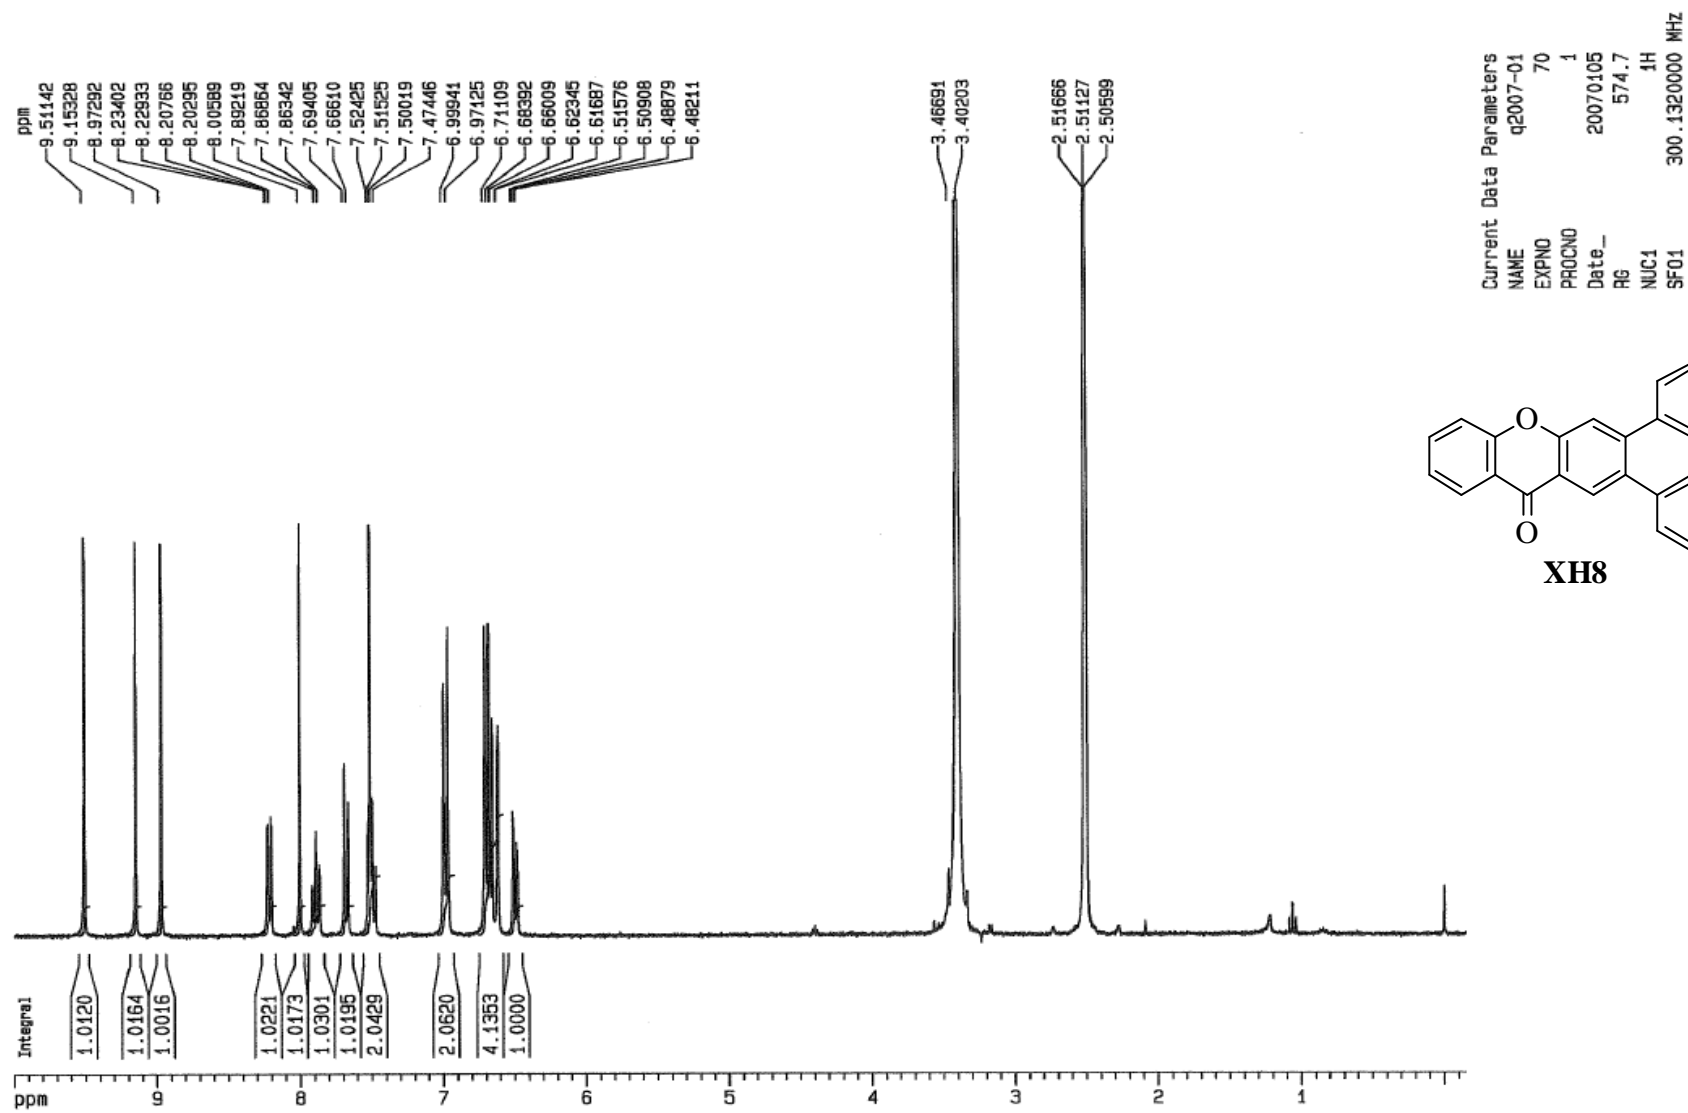



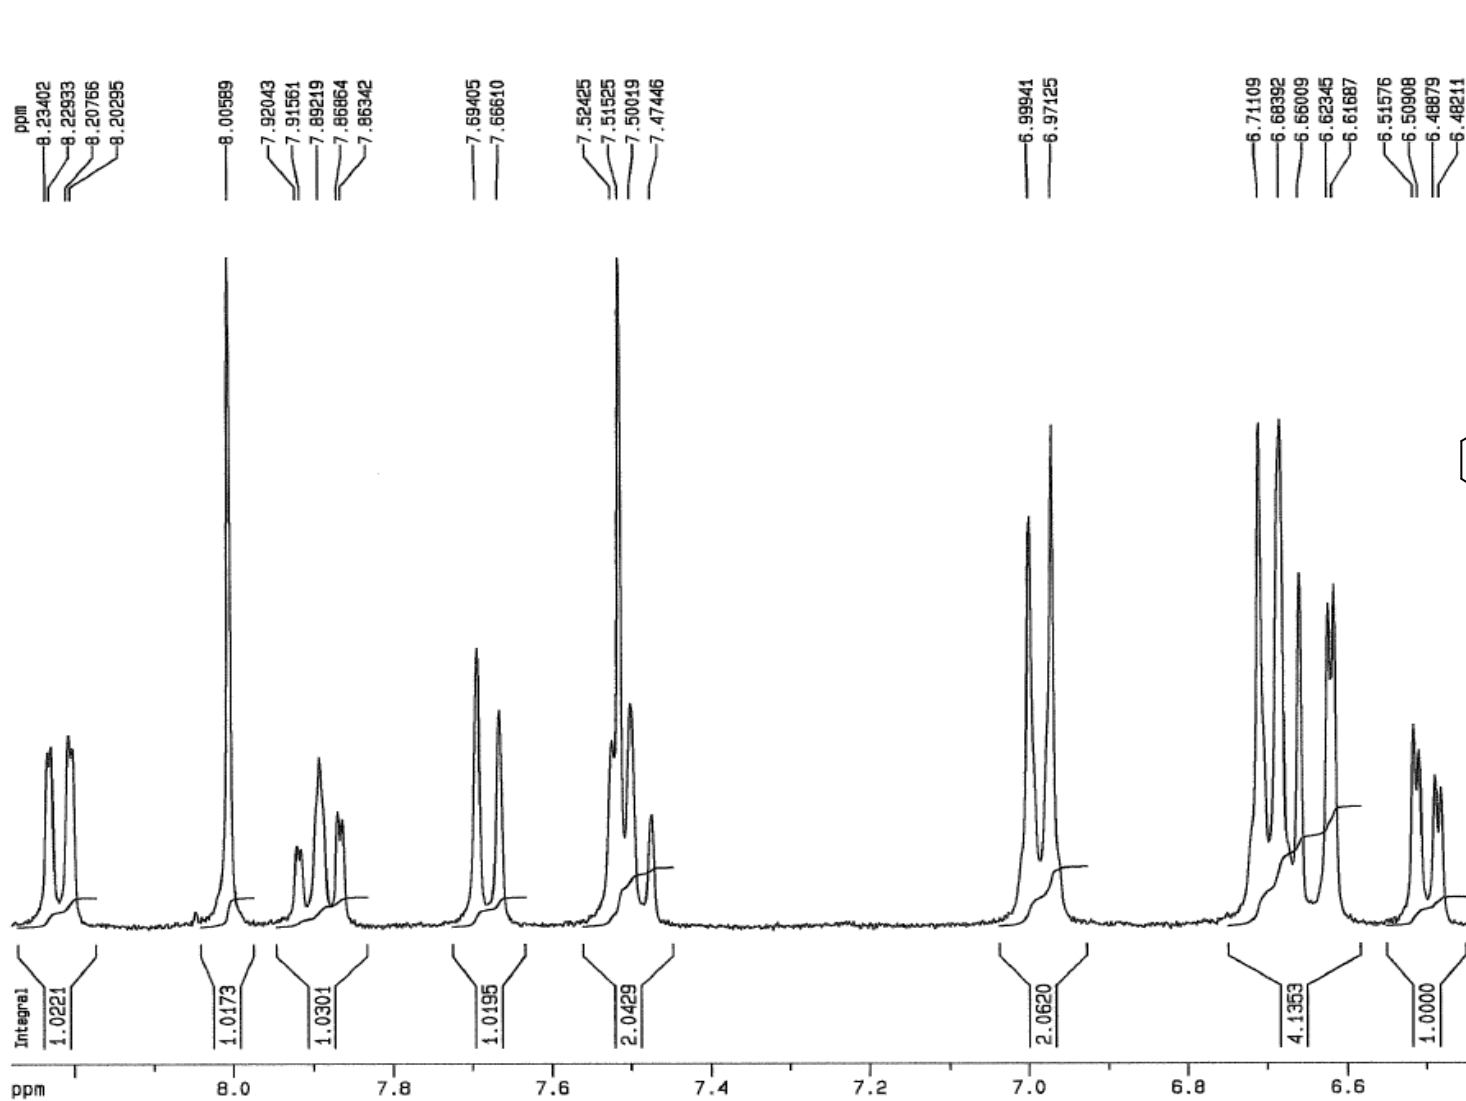

Current Data Parameters  
NAME q2007-01  
EXPNO 70  
PROCNO 1  
Date\_ 20070105  
RG 574.7  
NUC1 1H  
SF01 300.132000 MHz

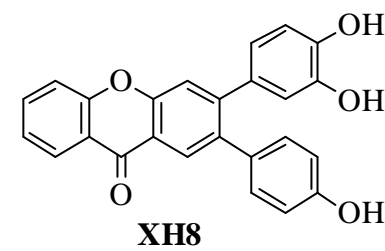

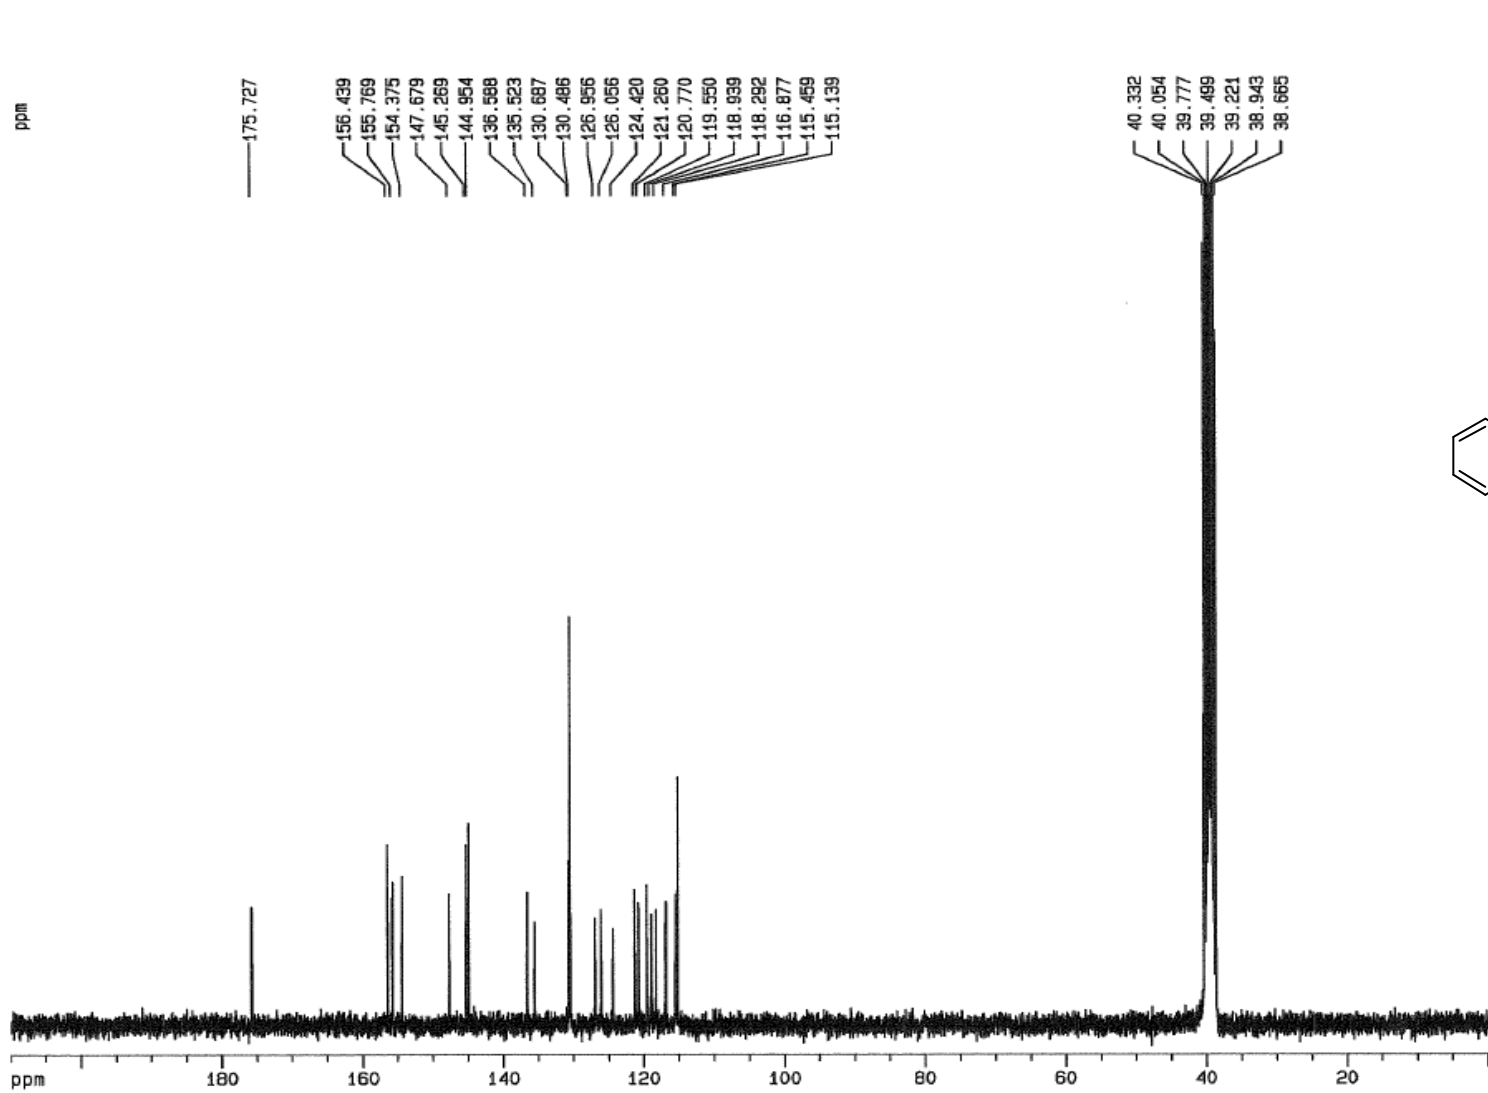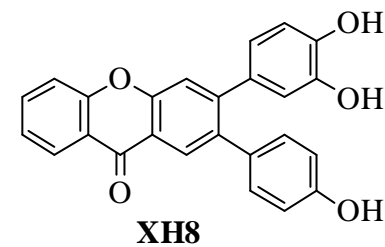

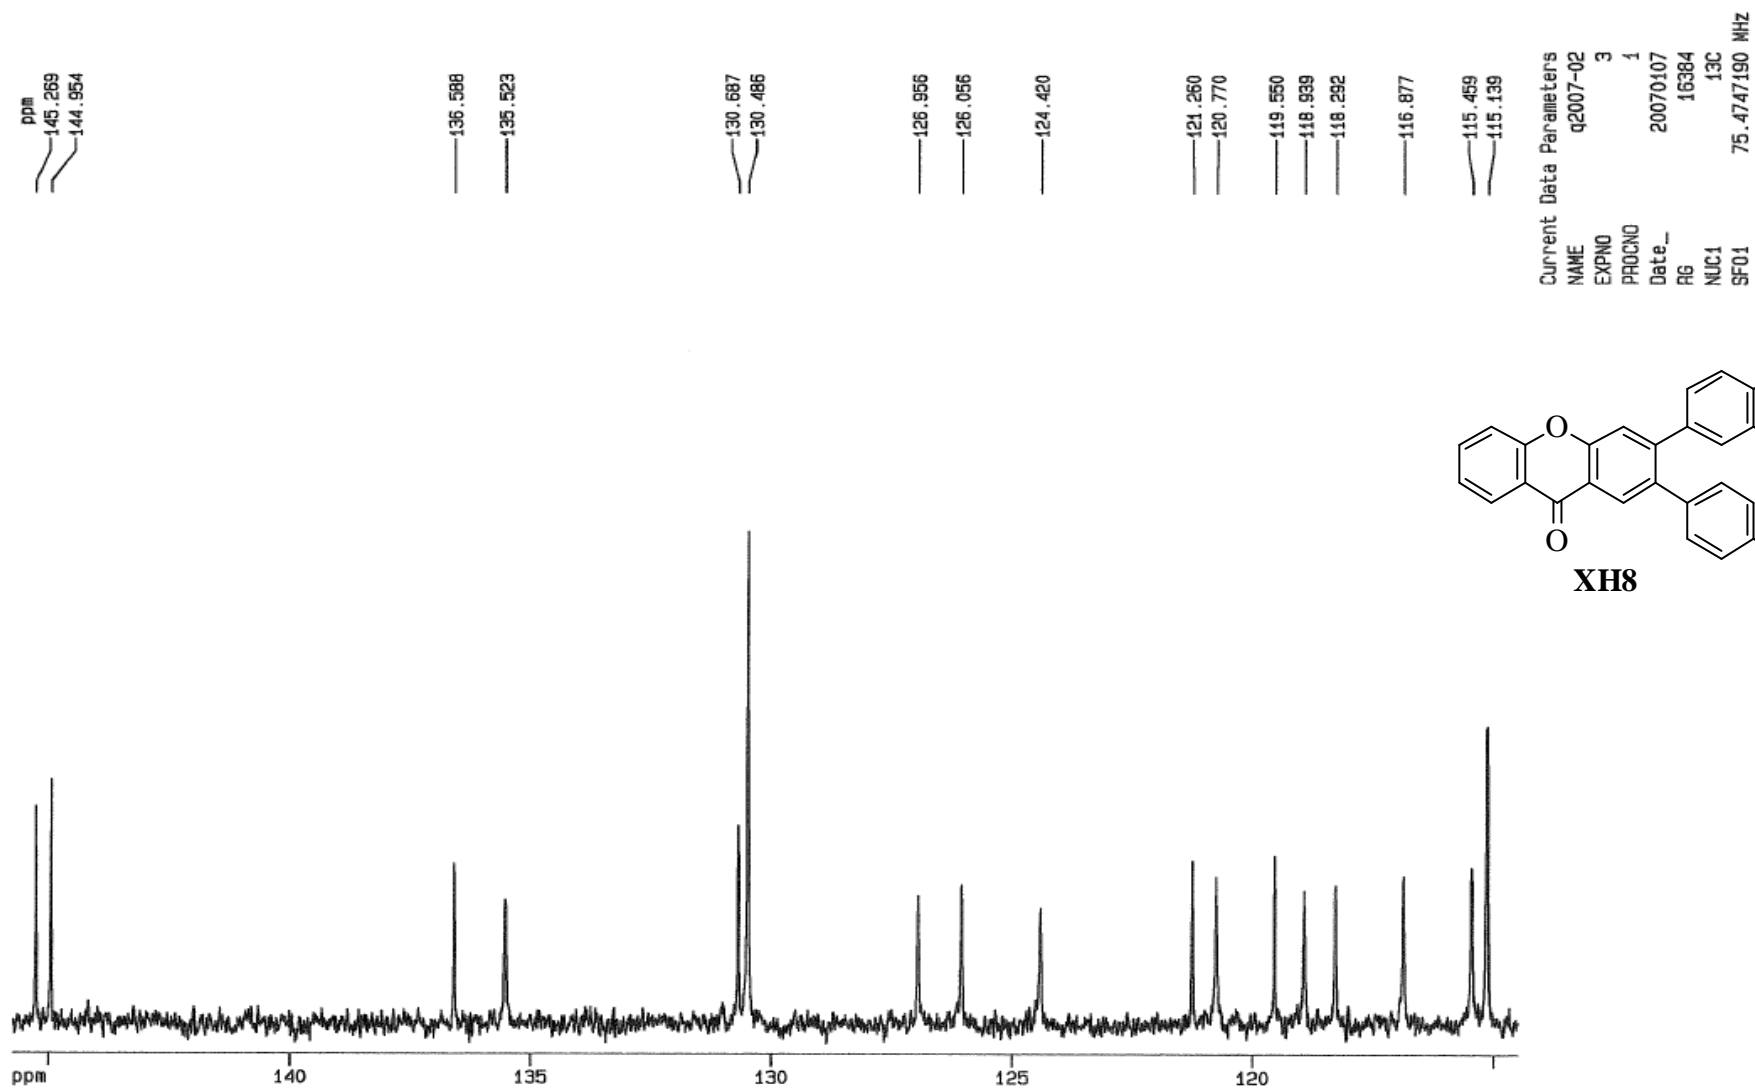

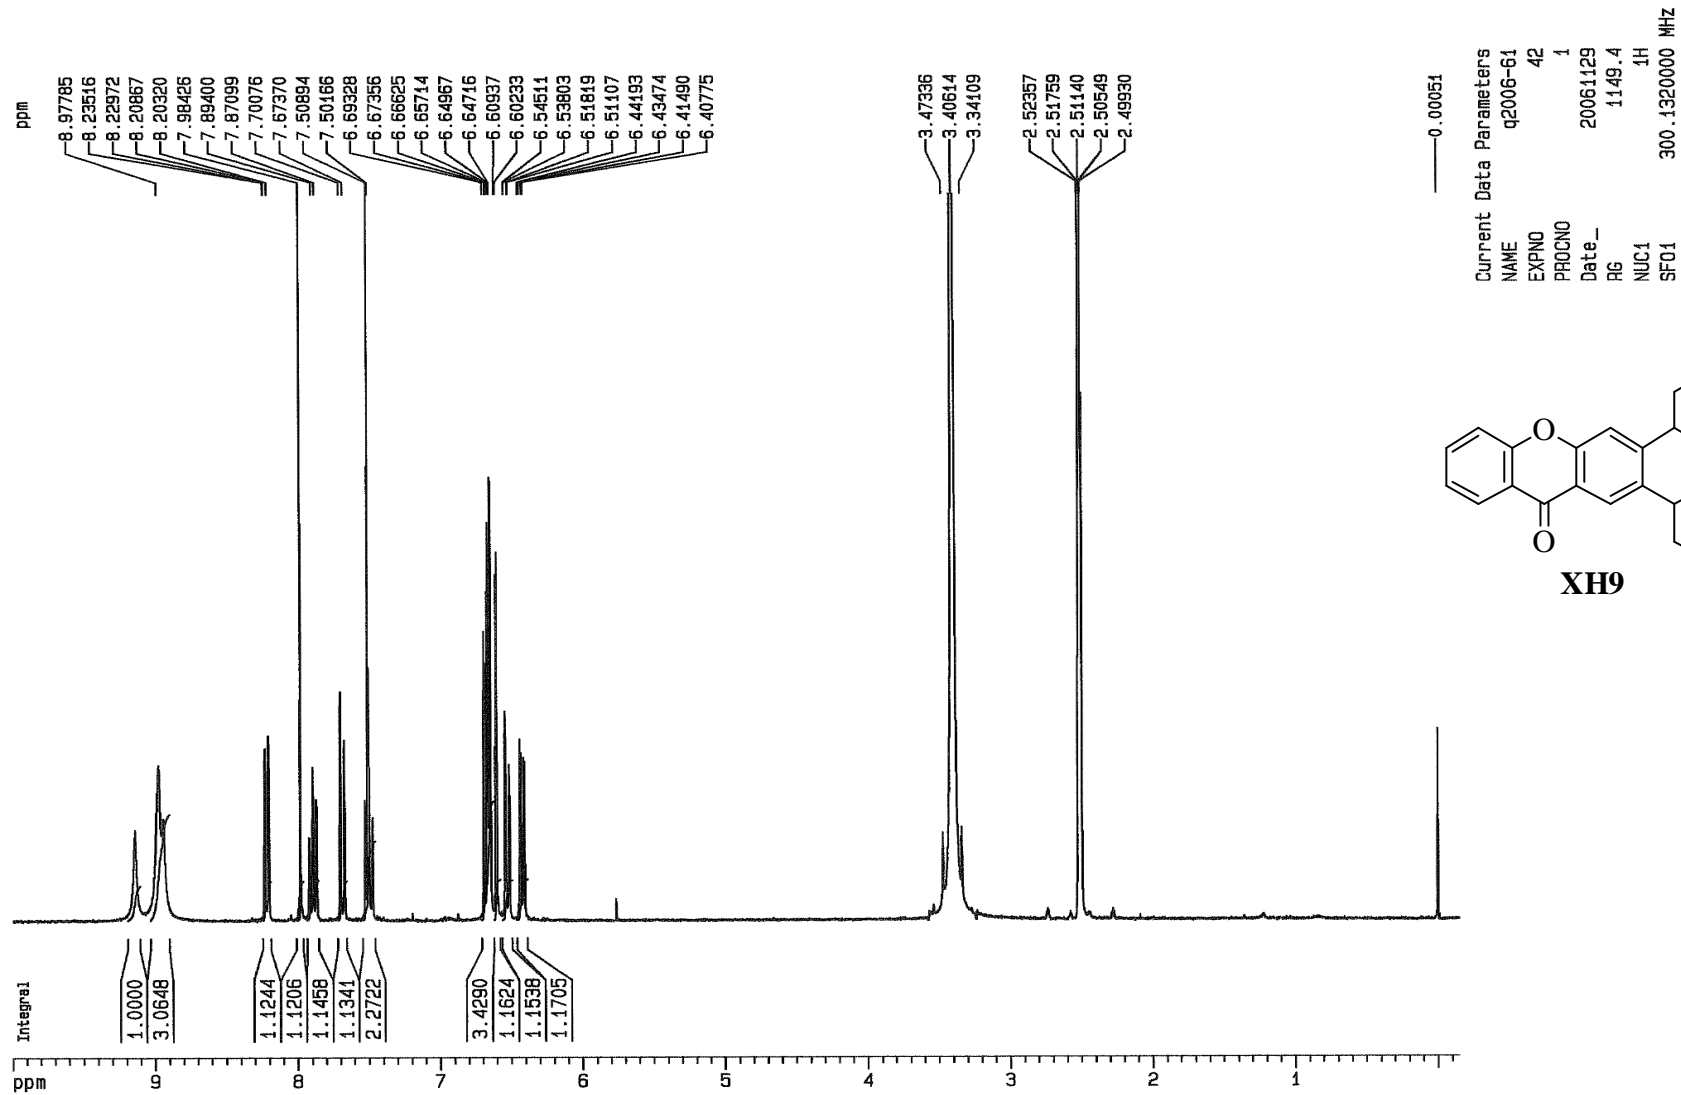

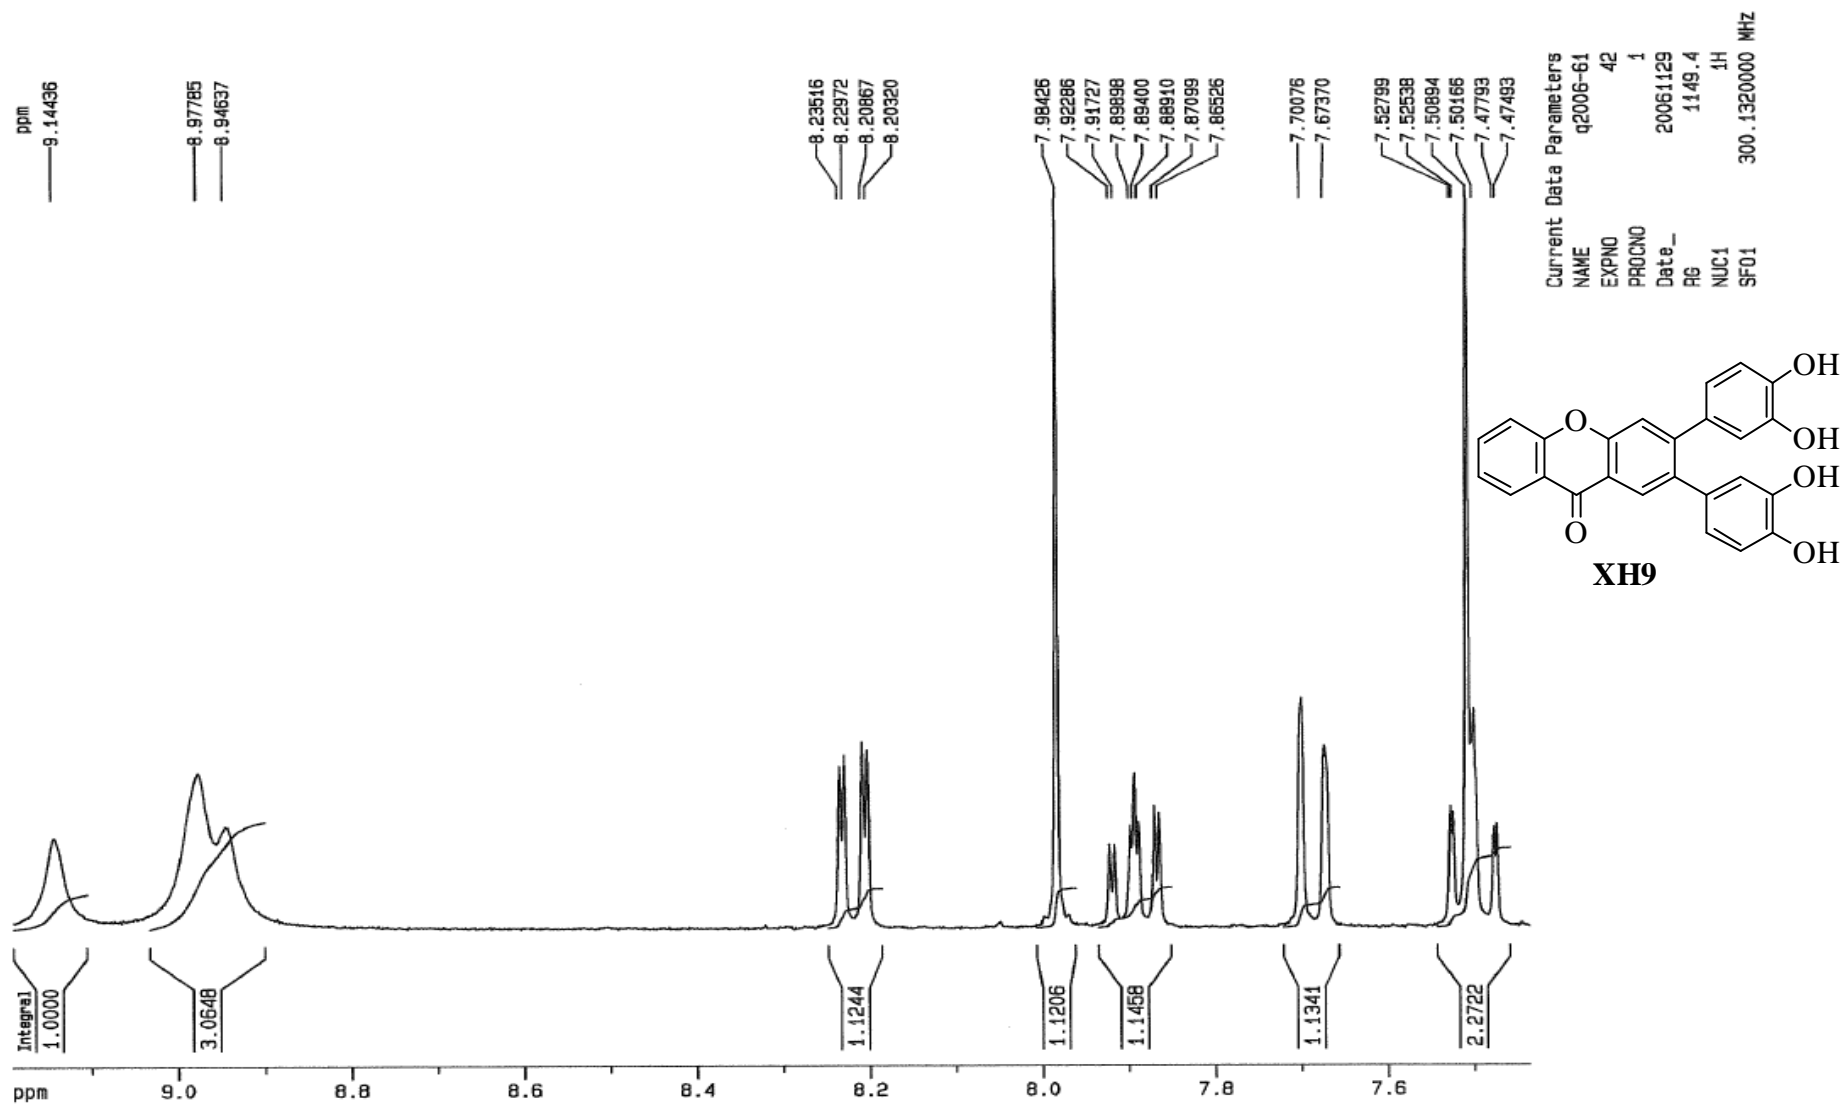

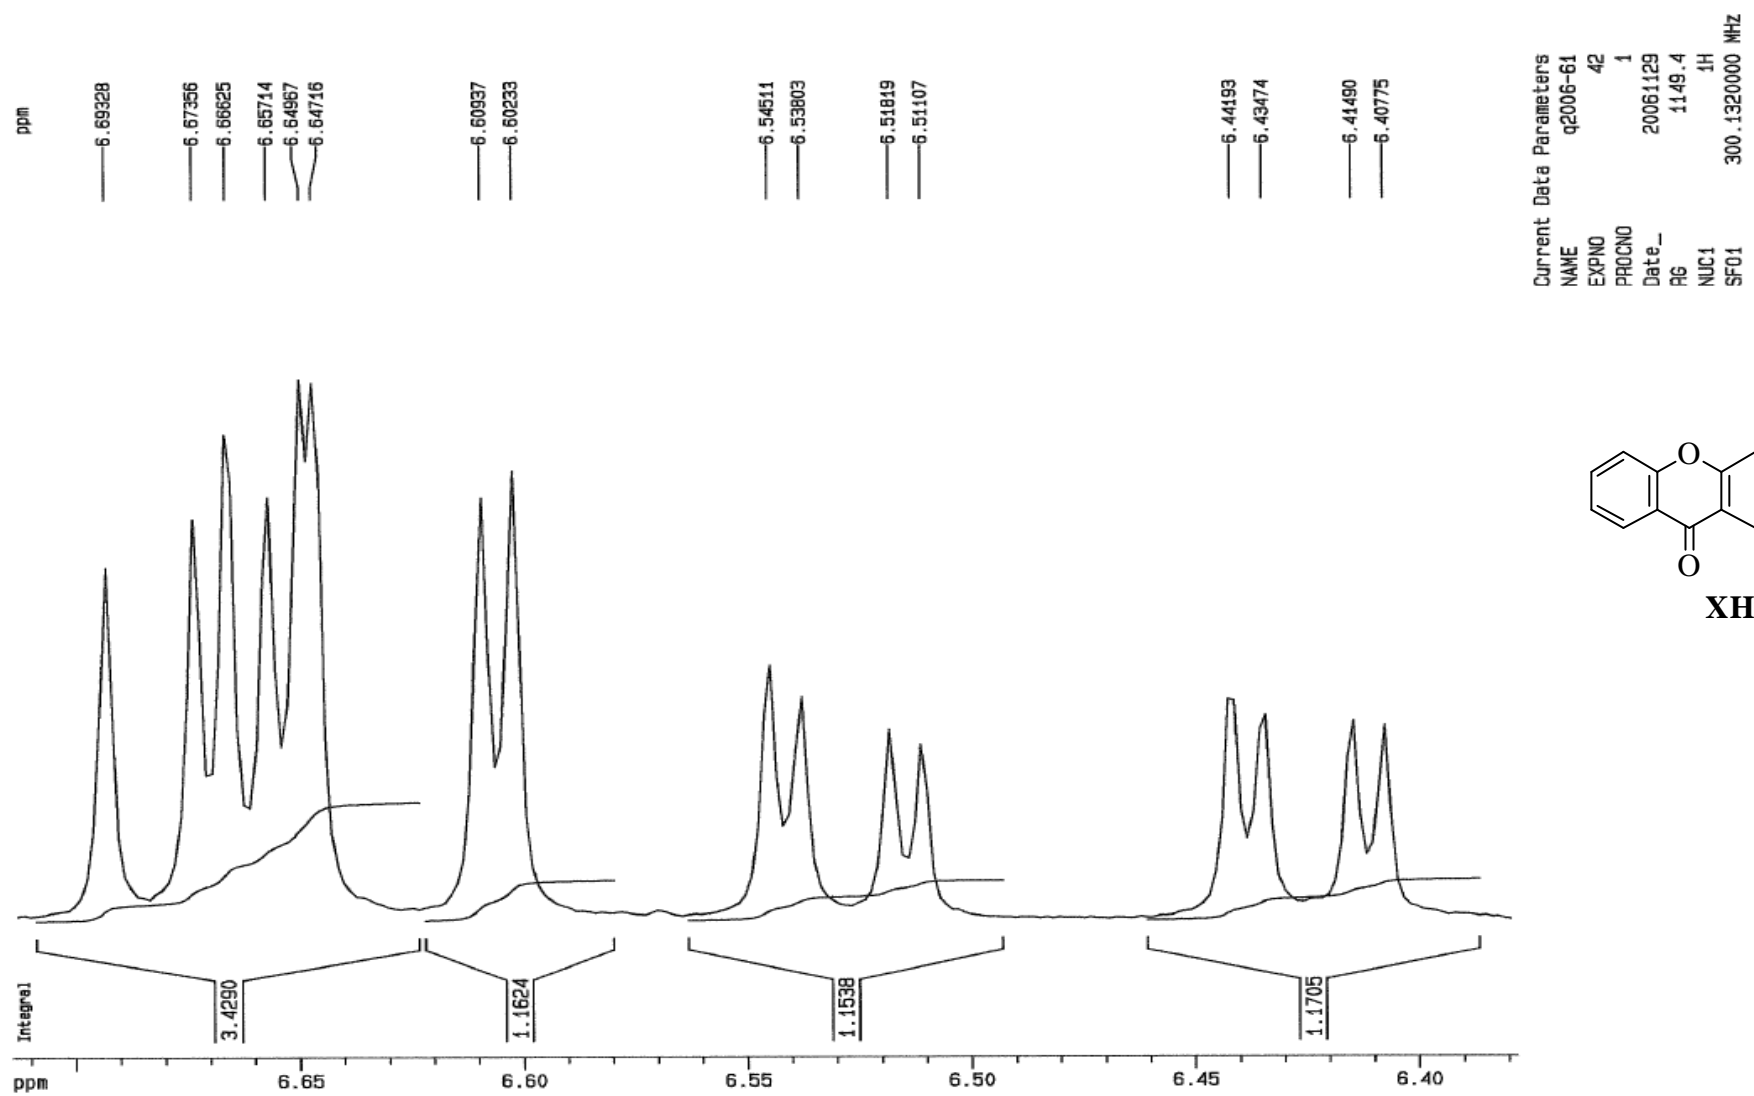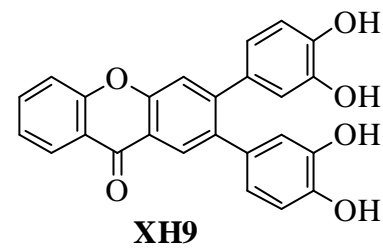

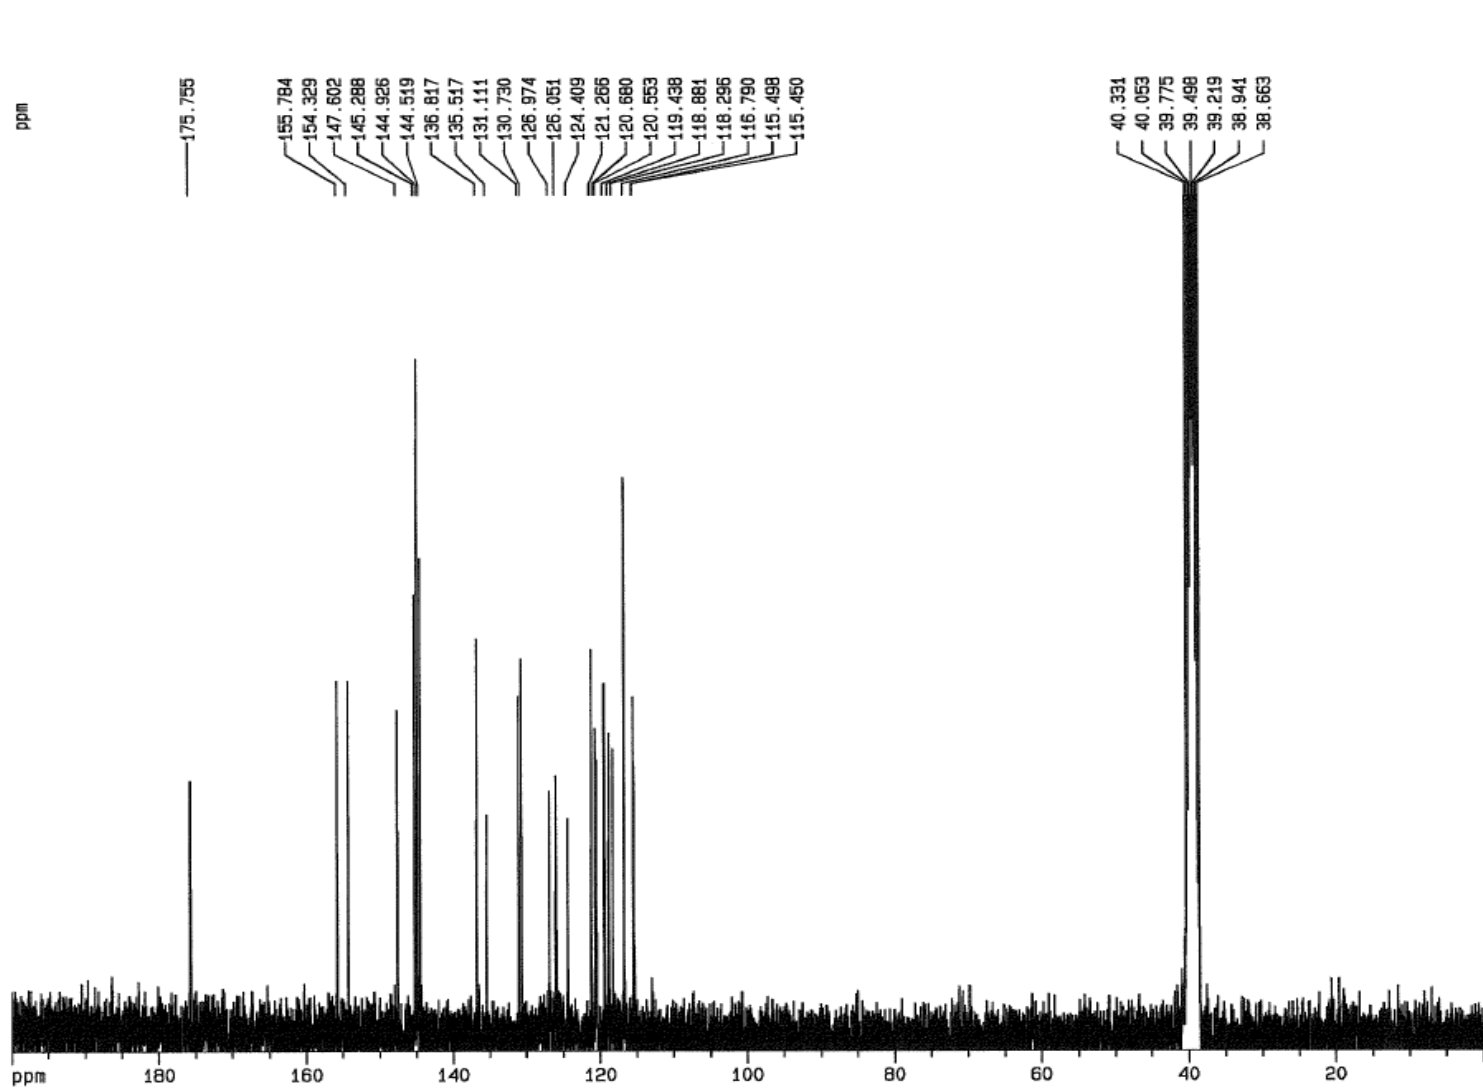

Current Data Parameters  
NAME q2006-61  
EXPNO 43  
PROCNO 1  
Date\_ 20061129  
RG 16384  
NUC1 13C  
SF01 75.4747190 MHz

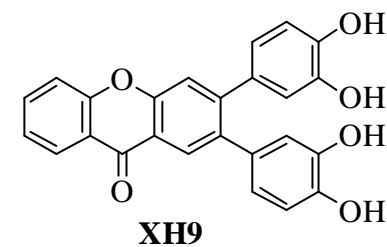

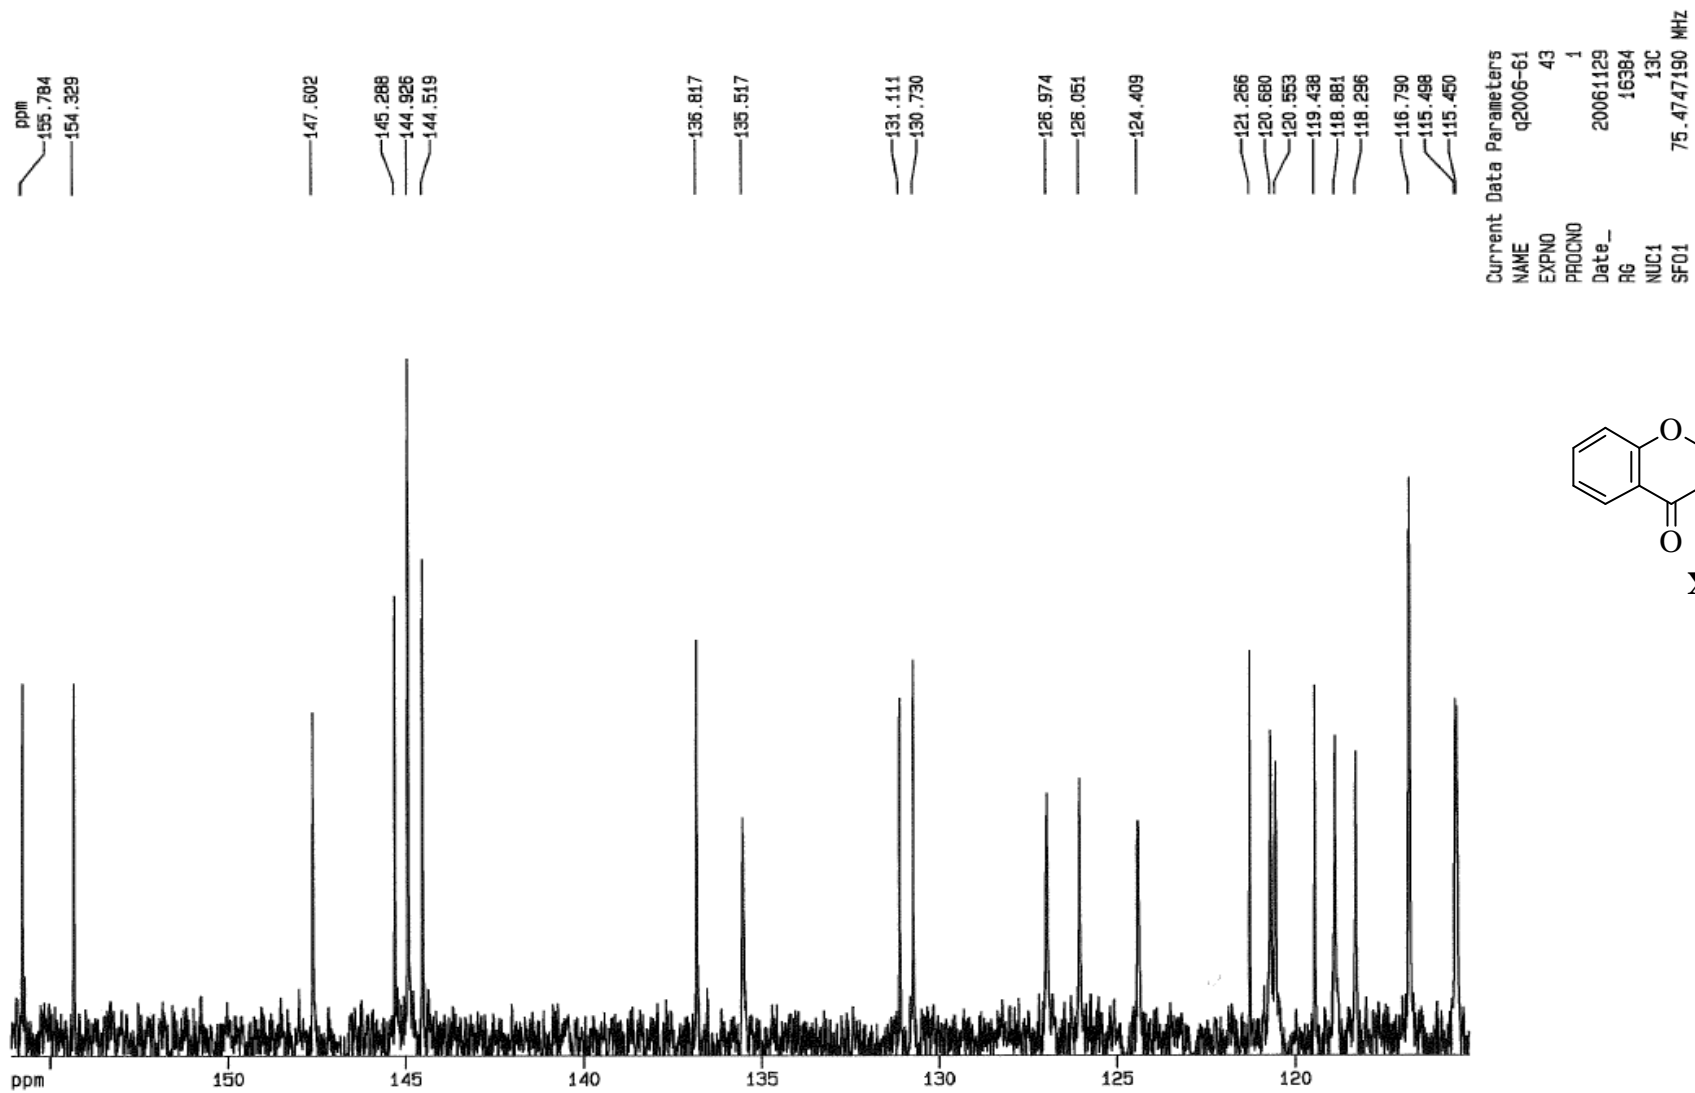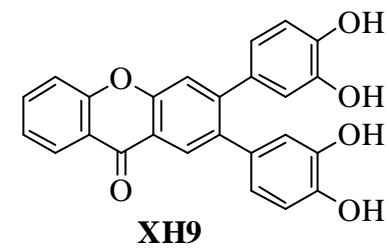

Supplement: c0ob00841a.pdf [file c0ob00841a.pdf]
